# Supplementary material for: Deciphering Huhu (Prionoplus reticularis) grub development: Transcriptomic insights into metabolic and nutritional shifts in larval stages
Source: Research Square preprint supplement (doi:10.21203/rs.3.rs-6564832/v1), 2025-05-02
Supplement: Supplementary file 1 [file 1b345bc42cf013612cdcc915.docx]

**SUPPLEMENTARY INFORMATION**

**(Additional File 3)**

**Deciphering Huhu (*Prionoplus reticularis*) grub development: Transcriptomic insights into metabolic and nutritional shifts in larval stages**

Ruchita Rao Kavle1,6✝
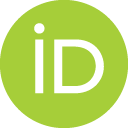
, Bennett Henzeler2,7,✝*
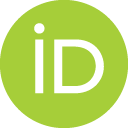
, Ngoni Faya4,8, Pascal Giehr5, Alaa El-Din Ahmed Bekhit1, Alan Carne3, Corinna Kersten5, Sabine Schneider5 and Dominic Agyei1,9*
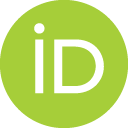


✝Ruchita Rao Kavle and Bennett Henzeler contributed equally to this work

7Present address: Ludwig-Maximilians University, Department of Chemistry, Institute of Chemical Epigenetics, 81377 Munich, Germany

9Present address: School of Chemistry, Monash University, Clayton, 3800, Victoria, Australia

*Correspondence:[dominic.agyei@monash.edu](mailto:dominic.agyei@monash.edu), [bennett.henzeler@cup.lmu.de](mailto:bennett.henzeler@cup.lmu.de)

Full list of author information is available at the end of the article

**A. Bash Scripts**

**1. fastQC**

#!/bin/bash -e

#SBATCH --cpus-per-task=6

#SBATCH --job-name=1.FastQC

#SBATCH --time=12:00:00

fastqc *.fastq.gz -o ./’

**2. Trimmomatic**

#!/bin/bash -e

#SBATCH --cpus-per-task=12

#SBATCH --job-name 2.Trimmomatic

#SBATCH --gres=gpu:3

#SBATCH --time=6:00:00

# Create a directory for the trimmomatic logs if it doesn't already exist

mkdir -p ./logs

for filename in *_R1_001.fastq.gz;

do

base=$(basename ${filename} _R1_001.fastq.gz)

# Redirect the standard output (which includes the summary) to a log file

trimmomatic PE -threads 12 ${filename} ${base}_R2_001.fastq.gz \

./${base}_trim.R1_001.fastq.gz ./${base}_unpaired.trim.R1_001.fastq.gz \

./${base}_trim.R2_001.fastq.gz ./${base}_unpaired.trim.R2_001.fastq.gz \

SLIDINGWINDOW:4:20 MINLEN:50 ILLUMINACLIP:illumina_adapter.fa:2:40:15 \

> ./logs/${base}_trimmomatic.log 2>&1

Done

**3. Trinity**

#!/bin/bash -e

#SBATCH --cpus-per-task=16

#SBATCH --nodelist=zuse

#SBATCH --job-name=3a.Normalisation

#SBATCH --time=96:00:00

trimmomatic_dir=$(readlink -f ../2.Trimmomatic)

normalized_reads_dir=$(readlink -f ./normalised_reads_L)

LEFT_READS="$trimmomatic_dir/Huhu-L1_trim.R1_001.fastq.gz,$trimmomatic_dir/Huhu-L2_trim.R1_001.fastq.gz,$trimmomatic_dir/Huhu-L3_trim.R1_001.fastq.gz"

RIGHT_READS="$trimmomatic_dir/Huhu-L1_trim.R2_001.fastq.gz,$trimmomatic_dir/Huhu-L2_trim.R2_001.fastq.gz,$trimmomatic_dir/Huhu-L3_trim.R2_001.fastq.gz"

mkdir -p $normalized_reads_dir

singularity exec -e --bind $trimmomatic_dir,$normalized_reads_dir trinity.simg Trinity --normalize_reads \

--seqType fq \

--left $LEFT_READS \

--right $RIGHT_READS \

--max_memory 300G \

--bflyHeapSpaceMax 30G \

--CPU 16 \

--output $normalized_reads_dir/trinity_L \

--verbose

trimmomatic_dir=$(readlink -f ../2.Trimmomatic)

normalized_reads_dir=$(readlink -f ./normalised_reads_S)

LEFT_READS="$trimmomatic_dir/Huhu-S1_trim.R1_001.fastq.gz,$trimmomatic_dir/Huhu-S2_trim.R1_001.fastq.gz,$trimmomatic_dir/Huhu-S3_trim.R1_001.fastq.gz"

RIGHT_READS="$trimmomatic_dir/Huhu-S1_trim.R2_001.fastq.gz,$trimmomatic_dir/Huhu-S2_trim.R2_001.fastq.gz,$trimmomatic_dir/Huhu-S3_trim.R2_001.fastq.gz"

mkdir -p $normalized_reads_dir

singularity exec -e --bind $trimmomatic_dir,$normalized_reads_dir trinity.simg Trinity --normalize_reads \

--seqType fq \

--left $LEFT_READS \

--right $RIGHT_READS \

--max_memory 10G \

--CPU 24 \

--output $normalized_reads_dir/trinity_S

**4. Transdecoder**

#!/bin/bash -e

#SBATCH --cpus-per-task=12

#SBATCH --nodelist=zuse

#SBATCH --job-name=5.Transdecoder

#SBATCH --time=6:00:00

singularity exec -e transdecoder.simg TransDecoder.LongOrfs -t ../3.Trinity/normalised_reads_L/trinity_L.Trinity.fasta

singularity exec -e transdecoder.simg TransDecoder.Predict -t ../3.Trinity/normalised_reads_L/trinity_L.Trinity.fasta

singularity exec -e transdecoder.simg TransDecoder.LongOrfs -t ../3.Trinity/merged/trinity.Trinity.fasta

singularity exec -e transdecoder.simg TransDecoder.Predict -t ../3.Trinity/merged/trinity.Trinity.fasta

singularity exec -e transdecoder.simg TransDecoder.LongOrfs -t ../3.Trinity/normalised_reads_S/trinity_S.Trinity.fasta

singularity exec -e transdecoder.simg TransDecoder.Predict -t ../3.Trinity/normalised_reads_S/trinity_S.Trinity.fasta

singularity exec -e transdecoder.simg TransDecoder.LongOrfs -t ../8.CD-HIT/L_Trinity_CD-HIT.fasta

singularity exec -e transdecoder.simg TransDecoder.Predict -t ../8.CD-HIT/L_Trinity_CD-HIT.fasta

singularity exec -e transdecoder.simg TransDecoder.LongOrfs -t ../8.CD-HIT/S_Trinity_CD-HIT.fasta

singularity exec -e transdecoder.simg TransDecoder.Predict -t ../8.CD-HIT/S_Trinity_CD-HIT.fasta

**5. KisSplice**

#!/bin/bash -e

#SBATCH --cpus-per-task=6

#SBATCH --mem=16G

#SBATCH --nodelist=zuse

#SBATCH --job-name=Kissplice

ulimit -s unlimited

singularity exec -e kissplice.simg kissplice -s 1 -k 41 -t 12 \

-r ./Huhu-S1_R1.fastq.gz -r ./Huhu-S1_R2.fastq.gz \

-r ./Huhu-S2_R1.fastq.gz -r ./Huhu-S2_R2.fastq.gz \

-r ./Huhu-S3_R1.fastq.gz -r ./Huhu-S3_R2.fastq.gz \

-r ./Huhu-L1_R1.fastq.gz -r ./Huhu-L1_R2.fastq.gz \

-r ./Huhu-L2_R1.fastq.gz -r ./Huhu-L2_R2.fastq.gz \

-r ./Huhu-L3_R1.fastq.gz -r ./Huhu-L3_R2.fastq.gz

**6. BLAT**

#!/bin/bash -e

#SBATCH --cpus-per-task=12

#SBATCH --nodelist=zuse

#SBATCH --job-name=blat

#SBATCH --time=1:00:00

blat -minIdentity=80 ../L_Trinity_CD-HIT.fasta ../results/results_Huhu-L1_trim_Huhu-L1_trim_k41_coherents_type_0a.fa ./Huhu-L1.psl

**7. KisSplice2RefTranscriptome**

#!/bin/bash -e

#SBATCH --cpus-per-task=6

#SBATCH --nodelist=zuse

#SBATCH --job-name=kissplice2reftranscriptome

kissplice2reftranscriptome

-b S_Trinity_CD-HIT.fasta.transdecoder.bed

-k results_Huhu-S1_trim_Huhu-S1_trim_k41_type_0a.fa

-t Huhu-S1.psl

-s kissDE_output

-o Huhu-S1_mainOutput.tsv

-l Huhu-S1_lowQueryCoverageOutput.tsv

**8. CD-HIT**

#!/bin/bash -e

#SBATCH --cpus-per-task=20

#SBATCH --job-name=8.CD-HIT

#SBATCH --time=48:00:00

cd-hit-est -i ../3.Trinity/merged/trinity.Trinity.fasta -o Trinity_CD-HIT.fasta -c 0.95 -n 11 -p 1 -g 1 -M 200000 -T 20 -d 0

cd-hit-est -i ../3.Trinity/normalised_reads_S/trinity_S.Trinity.fasta -o S_Trinity_CD-HIT.fasta -c 0.95 -n 11 -p 1 -g 1 -M 200000 -T 20 -d 0

cd-hit-est -i ../3.Trinity/normalised_reads_L/trinity_L.Trinity.fasta -o L_Trinity_CD-HIT.fasta -c 0.95 -n 11 -p 1 -g 1 -M 200000 -T 20 -d 0

**9. rnaQUAST**

#!/bin/bash -e

#SBATCH --cpus-per-task=12

#SBATCH --nodelist=zuse

#SBATCH --job-name=6.RNAquast

#SBATCH --time=2:00:00

python ./rnaQUAST.py --threads 12 --gene_mark --busco BUSCO --transcripts ./trinity_S.Trinity.fasta --reference ./trinity_S.Trinity.fasta --gtf ./trinity_S.Trinity.fasta.transdecoder.gff3 --output_dir trinity_S

python ./rnaQUAST.py --threads 12 --gene_mark --busco BUSCO --transcripts ./trinity_L.Trinity.fasta --reference ./trinity_L.Trinity.fasta --gtf ./trinity_L.Trinity.fasta.transdecoder.gff3 --output_dir trinity_L

python ./rnaQUAST.py --threads 12 --gene_mark --busco BUSCO --transcripts ./S_Trinity_CD-HIT.fasta --reference ./S_Trinity_CD-HIT.fasta --gtf ./S_Trinity_CD-HIT.fasta.transdecoder.gff3 --output_dir trinity_S_CD-HIT

python ./rnaQUAST.py --threads 12 --gene_mark --busco BUSCO --transcripts ./L_Trinity_CD-HIT.fasta --reference ./L_Trinity_CD-HIT.fasta --gtf ./L_Trinity_CD-HIT.fasta.transdecoder.gff3 --output_dir trinity_L_CD-HIT

**10. transRate**

#!/bin/bash -e

#SBATCH --cpus-per-task=12

#SBATCH --nodelist=zuse

#SBATCH --job-name=10.transrate

#SBATCH --time=1:00:00

transrate --assembly trinity_L.Trinity.fasta --reference trinity_L.Trinity.fasta --threads 12 --output trinity_L

transrate --assembly trinity_S.Trinity.fasta --reference trinity_S.Trinity.fasta --threads 12 --output trinity_S

**11. BUSCO**

#!/bin/bash -e

#SBATCH --cpus-per-task=12

#SBATCH --nodelist=zuse

#SBATCH --job-name=11.busco

#SBATCH --time=48:00:00

singularity exec -e busco.sif busco --in S_Trinity_CD-HIT.fasta --mode transcriptome --auto-lineage --cpu 12 --out S_Trinity

singularity exec -e busco.sif busco --in L_Trinity_CD-HIT.fasta --mode transcriptome --auto-lineage --cpu 12 --out L_Trinity

**12. BLAST database download**

#!/bin/bash -e

#SBATCH --cpus-per-task=32

#SBATCH --job-name=database_download

#SBATCH --nodelist=zuse

#SBATCH --mem=100G

download_part() {

local part=$1

update_blastdb.pl $part --decompress

}

export -f download_part

all_parts=$(update_blastdb.pl --showall | grep '^nt' | awk '{print $1}')

echo "$all_parts" | parallel -j 8 download_part

echo "All parts of the nt database have been downloaded."

**13. BLAST**

#!/bin/bash -e

#SBATCH --cpus-per-task=32

#SBATCH --job-name=9a.blastp

#SBATCH --nodelist=zuse

#SBATCH --mem=100G

run_blastp() {

local db=$1

local output=$2

blastp -query ./trinity.Trinity.fasta.transdecoder.pep \

-db "$db" \

-out "$output" \

-evalue 1e-5 \

-num_threads 32 \

-max_target_seqs 500 \

-outfmt "6 qseqid sseqid pident length mismatch gapopen evalue bitscore staxids ssciname scomname sskingdoms"

}

run_blastp "./swissprot" "blastp.outfmt6"

#SBATCH --cpus-per-task=32

#SBATCH --job-name=9b.blastp

#SBATCH --nodelist=zuse

#SBATCH --mem=300G

run_blastp() {

local db=$1

local output=$2

blastp -query ./trinity_L.Trinity.fasta.transdecoder.pep \

-db "$db" \

-out "$output" \

-evalue 1e-10 \

-num_threads 32 \

-max_target_seqs 500 \

-outfmt "6 qseqid sseqid pident length mismatch gapopen evalue bitscore staxids ssciname scomname sskingdoms"

}

run_blastp "./swissprot" "blastp_L.outfmt6"

#SBATCH --cpus-per-task=32

#SBATCH --job-name=9c.blastp

#SBATCH --nodelist=zuse

#SBATCH --mem=300G

# Define a function to run blastx for a given database

run_blastp() {

local db=$1

local output=$2

blastp -query ./trinity_S.Trinity.fasta.transdecoder.pep \

-db "$db" \

-out "$output" \

-evalue 1e-10 \

-num_threads 32 \

-max_target_seqs 500 \

-outfmt "6 qseqid sseqid pident length mismatch gapopen evalue bitscore staxids ssciname scomname sskingdoms"

}

run_blastp "./swissprot" "blastp_S.outfmt6"

#SBATCH --cpus-per-task=32

#SBATCH --job-name=10a.blastn

#SBATCH --nodelist=zuse

#SBATCH --mem=100G

# Define a function to run blastx for a given database

run_blastn() {

local db=$1

local output=$2

blastn -query ./trinity.Trinity.fasta \

-db "$db" \

-out "$output" \

-evalue 1e-5 \

-num_threads 32 \

-max_target_seqs 500 \

-outfmt "6 qseqid sseqid pident length mismatch gapopen evalue bitscore staxids ssciname scomname sskingdoms"

}

run_blastn "./nt" "blastn.outfmt6"

#SBATCH --cpus-per-task=32

#SBATCH --job-name=10b.blastn

#SBATCH --nodelist=zuse

#SBATCH --mem=100G

# Define a function to run blastx for a given database

run_blastn() {

local db=$1

local output=$2

blastn -query ./trinity_S.Trinity.fasta \

-db "$db" \

-out "$output" \

-evalue 1e-5 \

-num_threads 32 \

-max_target_seqs 500 \

-outfmt "6 qseqid sseqid pident length mismatch gapopen evalue bitscore staxids ssciname scomname sskingdoms"

}

run_blastn "./nt" "blastn_S.outfmt6"

#SBATCH --cpus-per-task=32

#SBATCH --job-name=10c.blastn

#SBATCH --nodelist=zuse

#SBATCH --mem=100G

# Define a function to run blastx for a given database

run_blastn() {

local db=$1

local output=$2

blastn -query ./trinity_L.Trinity.fasta \

-db "$db" \

-out "$output" \

-evalue 1e-5 \

-num_threads 32 \

-max_target_seqs 500 \

-outfmt "6 qseqid sseqid pident length mismatch gapopen evalue bitscore staxids ssciname scomname sskingdoms"

}

run_blastn "./nt" "blastn_L.outfmt6"

**13. orthofinder**

#!/bin/bash -e

#SBATCH --cpus-per-task=60

#SBATCH --nodelist=zuse

#SBATCH --job-name=orthofinder

#SBATCH --time=24:00:00

orthofinder -f orthofinder/

**14. interproscan**

#!/bin/bash -e

#SBATCH --cpus-per-task=16

#SBATCH --nodelist=zuse

#SBATCH --job-name=15a.interproscan

mkdir temp_L

mkdir output_L

singularity run \

-B /mnt/nfs/home/bhenzeler/huhu/15.interproscan/:/data \

-B /mnt/nfs/home/bhenzeler/huhu/15.interproscan/interproscan-5.67-99.0/data:/opt/interproscan/data \

-B /mnt/nfs/home/bhenzeler/huhu/15.interproscan/output_L:/output_L \

-B /mnt/nfs/home/bhenzeler/huhu/15.interproscan/temp_L:/temp_L \

--pwd /opt/interproscan \

interproscan.sif \

-input /mnt/nfs/home/bhenzeler/huhu/3.Trinity/normalised_reads_L/trinity_L.Trinity.fasta \

--cpu 20 \

-f tsv -dp \

-goterms \

-pathways \

--disable-precalc \

--output-dir /output_L \

--tempdir /temp_L

#!/bin/bash -e

#SBATCH --cpus-per-task=16

#SBATCH --nodelist=zuse

#SBATCH --job-name=15b.interproscan

mkdir temp_S

mkdir output_S

singularity run \

-B /mnt/nfs/home/bhenzeler/huhu/15.interproscan/:/data \

-B /mnt/nfs/home/bhenzeler/huhu/15.interproscan/interproscan-5.67-99.0/data:/opt/interproscan/data \

-B /mnt/nfs/home/bhenzeler/huhu/15.interproscan/output_S:/output_S \

-B /mnt/nfs/home/bhenzeler/huhu/15.interproscan/temp_S:/temp_S \

--pwd /opt/interproscan \

interproscan.sif \

-input /mnt/nfs/home/bhenzeler/huhu/3.Trinity/normalised_reads_S/trinity_S.Trinity.fasta \

--cpu 20 \

-f tsv -dp \

-goterms \

-pathways \

--disable-precalc \

--output-dir /output_S \

--tempdir /temp_S

**15. deeptmhmm**

#!/bin/bash -e

#SBATCH --cpus-per-task=24

#BATCH --mem=100G

#SBATCH --nodelist=zuse

#SBATCH --job-name=preprocess_fasta

#SBATCH --time=240:00:00

python preprocess_fasta.py --input ../Large_P.fasta --output ../L_data_tm_custom.npz

python preprocess_fasta.py --input ../Small_P.fasta --output ../S_data_tm_custom.npz

#SBATCH --cpus-per-task=12

#SBATCH --gres=gpu:2

#SBATCH --nodelist=marvin

#SBATCH --job-name=15a.deeptmhmm

#SBATCH --time=240:00:00

biolib run DTU/DeepTMHMM --fasta S_Trinity_CD-HIT.fasta

singularity run \

-B /mnt/nfs/home/bhenzeler/huhu/15.interproscan/:/data \

-B /mnt/nfs/home/bhenzeler/huhu/15.interproscan/interproscan-5.67-99.0/data:/opt/interproscan/data \

-B /mnt/nfs/home/bhenzeler/huhu/15.interproscan/output_S:/output_S \

-B /mnt/nfs/home/bhenzeler/huhu/15.interproscan/temp_S:/temp_S \

--pwd /opt/interproscan \

interproscan.sif \

-input /mnt/nfs/home/bhenzeler/huhu/3.Trinity/normalised_reads_S/trinity_S.Trinity.fasta \

--cpu 20 \

-f tsv -dp \

-goterms \

-pathways \

--disable-precalc \

--output-dir /output_S \

--tempdir /temp_S

**16. signalp**

#!/bin/bash -e

#SBATCH --cpus-per-task=12

#SBATCH --nodelist=zuse

#SBATCH --job-name=16a.signalp

#SBATCH --time=240:00:00

signalp6 --fastafile ./Large_P.fasta --organism other --output_dir ./ --format txt --mode slow-sequential

#SBATCH --cpus-per-task=12

#SBATCH --nodelist=zuse

#SBATCH --job-name=16b.signalp

#SBATCH --time=240:00:00

signalp6 --fastafile ./Small_P.fasta --organism other --output_dir ./ --format txt --mode slow-sequential

**17. TMbed**

#!/bin/bash -e

#SBATCH --cpus-per-task=6

#SBATCH --gres=gpu:2

#SBATCH --ntasks=1

#SBATCH --nodelist=marvin

#SBATCH --job-name=17a.TMbed

#SBATCH --time=240:00:00

FASTA_FILE="Small_P.fasta" # Replace with your .fasta file path

EMBEDDINGS_FILE="Small_P.h5" # File to store embeddings

PREDICTIONS_FILE="Small_P.pred" # File to store predictions

export CUBLAS_WORKSPACE_CONFIG=:4096:8

echo "Generating embeddings..."

python -m tmbed embed -f "$FASTA_FILE" -e "$EMBEDDINGS_FILE" --use-gpu

if [ $? -ne 0 ]; then

echo "Error during embedding generation."

exit 1

fi

echo "Embeddings saved to $EMBEDDINGS_FILE."

echo "Predicting transmembrane proteins..."

python -m tmbed predict -f "$FASTA_FILE" -e "$EMBEDDINGS_FILE" -p "$PREDICTIONS_FILE" --use-gpu

if [ $? -ne 0 ]; then

echo "Error during prediction."

exit 1

fi

echo "Predictions saved to $PREDICTIONS_FILE."

echo "Prediction complete. Results:"

cat "$PREDICTIONS_FILE"

#SBATCH --cpus-per-task=6

#SBATCH --gres=gpu:2

#SBATCH --ntasks=1

#SBATCH --nodelist=marvin

#SBATCH --job-name=17b.TMbed

#SBATCH --time=240:00:00

FASTA_FILE="Large_P.fasta" # Replace with your .fasta file path

EMBEDDINGS_FILE="Large_P.h5" # File to store embeddings

PREDICTIONS_FILE="Large_P.pred" # File to store predictions

echo "Generating embeddings..."

python -m tmbed embed -f "$FASTA_FILE" -e "$EMBEDDINGS_FILE" --use-gpu

if [ $? -ne 0 ]; then

echo "Error during embedding generation."

exit 1

fi

echo "Embeddings saved to $EMBEDDINGS_FILE."

echo "Predicting transmembrane proteins..."

python -m tmbed predict -f "$FASTA_FILE" -e "$EMBEDDINGS_FILE" -p "$PREDICTIONS_FILE" --use-gpu

if [ $? -ne 0 ]; then

echo "Error during prediction."

exit 1

fi

echo "Predictions saved to $PREDICTIONS_FILE."

echo "Prediction complete. Results:"

cat "$PREDICTIONS_FILE"

**18. targetp**

#!/bin/bash -e

#SBATCH --cpus-per-task=24

#SBATCH --nodelist=zuse

#SBATCH --job-name=17a.targetp

#SBATCH --time=240:00:00

bin/targetp -fasta ./Small_P.fasta -org non-pl -format short -plot png -prefix ./Small_P_output

#!/bin/bash -e

#SBATCH --cpus-per-task=24

#SBATCH --nodelist=zuse

#SBATCH --job-name=17b.targetp

#SBATCH --time=240:00:00

bin/targetp -fasta ./Large_P.fasta -org non-pl -format short -plot png -prefix ./Large_P_output

**B. R Scripts**

**1. kissDE**

library(kissDE)

library(data.table)

library(ggplot2)

library(dplyr)

library(ggrepel)

list.files()

#Reading in data files from the Kissplice run

counts <- kissplice2counts("results_Huhu-S1_R1_Huhu-S1_R2_Huhu-S2_R1_Huhu-S2_R2_Huhu-S3_R1_Huhu-S3_R2_Huhu-L1_R1_Huhu-L1_R2_Huhu-L2_R1_Huhu-L2_R2_Huhu-L3_R1_Huhu-L3_R2_k41_coherents_type_0a.fa", counts = 0, pairedEnd = TRUE)

conditions <- c(rep("Huhu-S", 3), rep("Huhu-L", 3))

tiff('AS_counts_PCA.tiff', units="in", width=7.5, height=7.5, res=300, compression = 'lzw')

qualityControl(counts, conditions)

dev.off()

names(counts)

str(counts)

head(counts$countsEvents)

#Reading in data files from the Kissplice run

results <- diffExpressedVariants(counts, conditions, nbCore = 3, pvalue = 0.05, filterLowCountsVariants = 5)

writeOutputKissDE(results, output = "kissDE_output.tsv")

exploreResults("kissDE_output.tsv.rds")

# Load KissDE results

kiss_de_results <- fread('kissDE_output.tsv')

# Inspect the first few rows of the dataset

head(kiss_de_results)

# Replace zero p-values with a small value

kiss_de_results$`15.Adjusted_pvalue`[kiss_de_results$`15.Adjusted_pvalue` == 0] <- .Machine$double.xmin

# Calculate -log10(Adjusted p-value) and remove points above 12

kiss_de_results <- kiss_de_results %>%

mutate(log10_adj_pvalue = -log10(`15.Adjusted_pvalue`)) %>%

filter(log10_adj_pvalue <= 12)

# Filter significant events

significant_events <- kiss_de_results %>%

filter(`15.Adjusted_pvalue` < 0.05)

# Summarize significant events

kiss_de_summary <- significant_events %>%

summarize(

total_differential_events = n(),

mean_DeltaPSI = mean(`16.Deltaf/DeltaPSI`),

mean_adjusted_pvalue = mean(`15.Adjusted_pvalue`)

)

print(kiss_de_summary)

# Identify top 10 significant points based on absolute Delta PSI

top10_significant <- significant_events %>%

arrange(desc(abs(`16.Deltaf/DeltaPSI`))) %>%

head(10)

# Add a column to classify points as upregulated or downregulated

kiss_de_results <- kiss_de_results %>%

mutate(regulation = ifelse(`16.Deltaf/DeltaPSI` > 0, "Upregulated", "Downregulated"))

# Ensure there are no NA values in the regulation column

kiss_de_results <- kiss_de_results %>%

mutate(regulation = ifelse(is.na(regulation), "Unclassified", regulation))

# Volcano plot

p_volcano <- ggplot(kiss_de_results, aes(x = `16.Deltaf/DeltaPSI`, y = log10_adj_pvalue, color = regulation)) +

geom_point(alpha = 0.5, size = 2) + # Increase the size of the dots

geom_point(data = top10_significant, aes(x = `16.Deltaf/DeltaPSI`, y = log10_adj_pvalue), color = "black", size = 2) + # Highlight top 10 points

geom_text_repel(data = top10_significant, aes(label = `#1.ID`), color = "black", size = 3, box.padding = 0.5, max.overlaps = Inf) + # Make labels bold and increase max overlaps

labs(title = "Differential splicing events (Small vs Large)", x = "Delta PSI", y = "-log10(Adjusted p-value)", color = "Regulation") +

scale_color_manual(values = c("Upregulated" = "goldenrod2", "Downregulated" = "gold2")) + # Custom colors

scale_x_continuous(name = expression(Delta~"PSI"), limits = c(-1, 1),

breaks = seq(floor(min(kiss_de_results$`16.Deltaf/DeltaPSI`, na.rm = TRUE)),

ceiling(max(kiss_de_results$`16.Deltaf/DeltaPSI`, na.rm = TRUE)), by = 0.1)) +

scale_y_continuous(name = expression(-log[10]~"Adjusted p-value"), limits = c(1.5, 12),

breaks = seq(0, 13, by = 0.5)) +

theme_minimal() +

theme(

legend.position = "bottom",

legend.justification = "right",

panel.grid.major = element_line(color = "grey90", size = 0.2), # Lighter grid lines

panel.grid.minor = element_line(color = "grey95", size = 0.1), # Even lighter minor grid lines

axis.line = element_line(color = "black", size = 0.5), # Darker axis lines

plot.title = element_text(face = "bold"),

axis.title.x = element_text(face = "bold"),

axis.title.y = element_text(face = "bold"))

print(p_volcano)

# Save the volcano plot

ggsave("volcano_plot_kissDE.tiff", plot = p_volcano, width = 7.5, height = 5.1, units = "in", dpi = 1200, compression = 'lzw')

**2. k2rt**

library(tidyverse)

library(pheatmap)

# Reading in data files from the KissDE run

Huhu_k2rt <- read.table(file = 'Huhu_k2rt.tsv', sep = '\t', header = TRUE, check.names = FALSE)

# Removing unwanted annotations

Huhu_k2rt_filtered <- Huhu_k2rt %>%

filter(

Possible_sequencing_error %in% c(FALSE, "FALSE", "False", 0),

Amino_acid_1 != 'N/A', # Assuming columns for amino acids exist

Amino_acid_2 != 'N/A',

Is_condition_specific %in% c(TRUE, "TRUE", "True", 1),

`KissDE_p-value` < 0.05,

`KissDE_p-value` != 0,

!KissDE_DeltaF %in% c("NA", "NaN", "N/A"),

SNP_in_mutliple_assembled_genes %in% c(TRUE, "TRUE", "True", 1)

)

head(Huhu_k2rt_filtered)

# Create a summary of amino acid changes

amino_acid_changes <- Huhu_k2rt_filtered %>%

select(Amino_acid_1, Amino_acid_2) %>%

group_by(Amino_acid_1, Amino_acid_2) %>%

summarise(Count = n()) %>%

arrange(desc(Count))

# Transform data for heat map

amino_acid_matrix <- amino_acid_changes %>%

spread(key = Amino_acid_2, value = Count, fill = 0)

# Convert data to matrix

amino_acid_matrix_data <- as.matrix(amino_acid_matrix[,-1])

rownames(amino_acid_matrix_data) <- amino_acid_matrix$Amino_acid_1

colnames(amino_acid_matrix_data) <- colnames(amino_acid_matrix)[-1]

# Customize heat map colors and annotations

heatmap_colors <- colorRampPalette(c("ivory1", "#90EE90"))(256)

# Plotting the heat map with pheatmap

AA_change <- pheatmap(

amino_acid_matrix_data,

cluster_rows = FALSE,

cluster_cols = FALSE,

scale = "none",

color = heatmap_colors,

fontsize = 7,

fontsize_row = 7,

fontsize_col = 7,

main = "Amino acid changes",

display_numbers = FALSE,

number_color = "black",

border_color = "grey90",

legend = TRUE, # Ensure legend is displayed

legend_breaks = c(0, 10, 20, 30, 40, 50),

legend_labels = c("0", "10", "20", "30", "40", "50")

)

# Display the plot in the console

print(AA_change)

# Save the plot to a file

tiff('Aminoacid_change.tiff', units = "in", width = 4.5, height = 4.5, res = 1200, compression = 'lzw')

print(AA_change)

dev.off()

**3. blast**

# Load necessary libraries

library(tidyverse)

library(data.table)

library(cluster)

library(writexl)

library(ggdendro)

library(extrafont)

# Read the data

Huhu_blastn <- fread('Nr_Annotation.xls', sep = '\t', header = FALSE, fill = TRUE)

colnames(Huhu_blastn) <- c("Gene_ID", "NR_protein_ID", "Description", "Identity", "Evalue", "Score")

# Extract and clean the Species_Name

Huhu_blastn <- Huhu_blastn %>%

mutate(Species_Name = str_extract(Description, "\\[([^\\]]+)\\]") %>% str_remove_all("\\[|\\]")) %>%

mutate(Species_Name = str_replace(Species_Name, "(\\w+)\\s+(\\w+)", "\\1.\\2") %>%

str_replace("^(\\w)\\w*\\.", "\\1.") %>%

str_to_title())

# Save the updated data to a CSV file

fwrite(Huhu_blastn, 'Updated_Nr_Annotation.csv')

# Calculate species counts and select the top 15 species

species_counts <- Huhu_blastn %>%

group_by(Species_Name) %>%

summarise(count = n()) %>%

arrange(desc(count))

top_15_species <- species_counts %>%

slice_head(n = 15)

# Filter the original data to include only the top 15 species

Huhu_blastn_top_15 <- Huhu_blastn %>%

filter(Species_Name %in% top_15_species$Species_Name)

# Ensure Identity is numeric

Huhu_blastn_top_15 <- Huhu_blastn_top_15 %>%

mutate(Identity = as.numeric(str_remove(Identity, "%")))

# Aggregating data by species and calculating mean Identity for the top 15 species

aggregated_data <- Huhu_blastn_top_15 %>%

group_by(Species_Name) %>%

summarise(mean_identity = mean(Identity, na.rm = TRUE)) %>%

filter(!is.na(mean_identity))

# Clustering the species based on the mean Identity

clustering <- hclust(dist(aggregated_data$mean_identity))

# Export to PDF file with Arial font

svg('Cluster.svg', width = 8, height = 8, family = "Arial") # Specify font family as Arial

plot(clustering, labels = aggregated_data$Species_Name, main = "", xlab = "", sub = "", ylab = "", yaxt = "n")

# Add distance labels to the dendrogram branches

for (i in 1:length(clustering$height)) {

x_center <- mean(clustering$merge[i, ])

y_height <- clustering$height[i]

text(x_center, y_height, round(y_height, 1), pos = 3, cex = 0.8, family = "Arial")

}

# Highlight clusters with k = 3

rect.hclust(clustering, k = 3, border = c("grey", "grey", "goldenrod1"))

# Close the device

dev.off()

**4. Uniprot**

#Load necessary libraries

library(tidyverse)

#Read and process the tsv files

uniprot <- read_tsv('idmapping_2024_11_13.tsv', col_types = cols(.default = "c"))

write.csv(uniprot,"uniprot.csv")

#Allergens

allergens <- uniprot %>%

filter(!is.na(`Allergenic Properties`)) %>%

select(`Entry Name`, `Protein names`, `Allergenic Properties`, `Organism`) %>%

group_by(`Allergenic Properties`) %>%

summarise_all(list) %>%

ungroup()%>%

unnest(cols = everything())

write.csv(allergens,"Allergens.csv")

#Disease

disease <- uniprot %>%

filter(!is.na(`Involvement in disease`)) %>%

select(`Entry Name`, `Protein names`, `Involvement in disease`, `Organism`) %>%

group_by(`Involvement in disease`) %>%

summarise_all(list) %>%

ungroup()%>%

unnest(cols = everything())

write.csv(disease,"Disease.csv")

#Virus hosts

virushosts <- uniprot %>%

filter(!is.na(`Virus hosts`)) %>%

select(`Entry Name`, `Protein names`, `Virus hosts`, `Organism`) %>%

group_by(`Virus hosts`) %>%

summarise_all(list) %>%

ungroup()%>%

unnest(cols = everything())

write.csv(virushosts,"Virushosts.csv")

#Post-translational modification

ptm <- uniprot %>%

filter(!is.na(`Post-translational modification`)) %>%

select(`Entry Name`, `Protein names`, `Post-translational modification`, `Organism`) %>%

group_by(`Post-translational modification`) %>%

summarise_all(list) %>%

ungroup()%>%

unnest(cols = everything())

write.csv(ptm,"ptm.csv")

#Kinetics

kinetics <- uniprot %>%

filter(!is.na(`Kinetics`)) %>%

select(`Entry Name`, `Protein names`, `Kinetics`, `Organism`) %>%

group_by(`Kinetics`) %>%

summarise_all(list) %>%

ungroup()%>%

unnest(cols = everything())

write.csv(kinetics,"Kinetics.csv")

#Catalytic activity

Catalytic_activity <- uniprot %>%

filter(!is.na(`Catalytic activity`)) %>%

select(`Entry Name`, `Protein names`, `Catalytic activity`, `Organism`) %>%

group_by(`Catalytic activity`) %>%

summarise_all(list) %>%

ungroup()%>%

unnest(cols = everything())

write.csv(Catalytic_activity,"Catalytic_activity.csv")

#Zinc finger

zf <- uniprot %>%

filter(!is.na(`Zinc finger`)) %>%

select(`Entry Name`, `Protein names`, `Zinc finger`, `Organism`) %>%

group_by(`Zinc finger`) %>%

summarise_all(list) %>%

ungroup()%>%

unnest(cols = everything())

write.csv(zf,"zf.csv")

#Cofactor

Cofactor <- uniprot %>%

filter(!is.na(`Cofactor`)) %>%

select(`Entry Name`, `Protein names`, `Cofactor`, `Organism`) %>%

group_by(`Cofactor`) %>%

summarise_all(list) %>%

ungroup()%>%

unnest(cols = everything())

write.csv(Cofactor,"Cofactor.csv")

#DNA binding

DNAbinding <- uniprot %>%

filter(!is.na(`DNA binding`)) %>%

select(`Entry Name`, `Protein names`, `DNA binding`, `Organism`) %>%

group_by(`DNA binding`) %>%

summarise_all(list) %>%

ungroup()%>%

unnest(cols = everything())

write.csv(DNAbinding,"DNA_binding.csv")

#Toxic dose

Toxicdose <- uniprot %>%

filter(!is.na(`Toxic dose`)) %>%

select(`Entry Name`, `Protein names`, `Toxic dose`, `Organism`) %>%

group_by(`Toxic dose`) %>%

summarise_all(list) %>%

ungroup()%>%

unnest(cols = everything())

write.csv(Toxicdose,"Toxic_dose.csv")

#Pharmaceutical use

Pharmaceutical <- uniprot %>%

filter(!is.na(`Pharmaceutical use`)) %>%

select(`Entry Name`, `Protein names`, `Pharmaceutical use`, `Organism`) %>%

group_by(`Pharmaceutical use`) %>%

summarise_all(list) %>%

ungroup()%>%

unnest(cols = everything())

write.csv(Pharmaceutical,"Pharmaceutical.csv")

#Transmembrane

Transmembrane <- uniprot %>%

filter(!is.na(`Transmembrane`)) %>%

select(`Entry Name`, `Protein names`, `Transmembrane`, `Organism`) %>%

group_by(`Transmembrane`) %>%

summarise_all(list) %>%

ungroup()%>%

unnest(cols = everything())

write.csv(Transmembrane,"Transmembrane.csv")

#Intramembrane

Intramembrane <- uniprot %>%

filter(!is.na(`Intramembrane`)) %>%

select(`Entry Name`, `Protein names`, `Intramembrane`, `Organism`) %>%

group_by(`Intramembrane`) %>%

summarise_all(list) %>%

ungroup()%>%

unnest(cols = everything())

write.csv(Intramembrane,"Intramembrane.csv")

#Signal peptide

Signalpeptide <- uniprot %>%

filter(!is.na(`Signal peptide`)) %>%

select(`Entry Name`, `Protein names`, `Signal peptide`, `Organism`) %>%

group_by(`Signal peptide`) %>%

summarise_all(list) %>%

ungroup()%>%

unnest(cols = everything())

write.csv(Signalpeptide,"Signal_peptide.csv")

#Motif

Motif <- uniprot %>%

filter(!is.na(`Motif`)) %>%

select(`Entry Name`, `Protein names`, `Motif`, `Organism`) %>%

group_by(`Motif`) %>%

summarise_all(list) %>%

ungroup()%>%

unnest(cols = everything())

write.csv(Motif,"Motif.csv")

#Protein families

Proteinfamilies <- uniprot %>%

filter(!is.na(`Protein families`)) %>%

select(`Entry Name`, `Protein names`, `Protein families`, `Organism`) %>%

group_by(`Protein families`) %>%

summarise_all(list) %>%

ungroup()%>%

unnest(cols = everything())

write.csv(Proteinfamilies,"Protein_families.csv")

#DrugBank

DrugBank <- uniprot %>%

filter(!is.na(`DrugBank`)) %>%

select(`Entry Name`, `Protein names`, `DrugBank`, `Organism`) %>%

group_by(`DrugBank`) %>%

summarise_all(list) %>%

ungroup()%>%

unnest(cols = everything())

write.csv(DrugBank,"DrugBank.csv")

#Allergome

Allergome <- uniprot %>%

filter(!is.na(`Allergome`)) %>%

select(`Entry Name`, `Protein names`, `Allergome`, `Organism`) %>%

group_by(`Allergome`) %>%

summarise_all(list) %>%

ungroup()%>%

unnest(cols = everything())

write.csv(Allergome,"Allergome.csv")

#Antibodypedia

Antibodypedia <- uniprot %>%

filter(!is.na(`Antibodypedia`)) %>%

select(`Entry Name`, `Protein names`, `Antibodypedia`, `Organism`) %>%

group_by(`Antibodypedia`) %>%

summarise_all(list) %>%

ungroup()%>%

unnest(cols = everything())

write.csv(Antibodypedia,"Antibodypedia.csv")

#GeneTree

GeneTree <- uniprot %>%

filter(!is.na(`GeneTree`)) %>%

select(`Entry Name`, `Protein names`, `GeneTree`, `Organism`) %>%

group_by(`GeneTree`) %>%

summarise_all(list) %>%

ungroup()%>%

unnest(cols = everything())

write.csv(GeneTree,"GeneTree.csv")

#eggNOG

eggNOG <- uniprot %>%

filter(!is.na(`eggNOG`)) %>%

select(`Entry Name`, `Protein names`, `eggNOG`, `Organism`) %>%

group_by(`eggNOG`) %>%

summarise_all(list) %>%

ungroup()%>%

unnest(cols = everything())

write.csv(eggNOG,"eggNOG.csv")

#PlantReactome

PlantReactome <- uniprot %>%

filter(!is.na(`PlantReactome`)) %>%

select(`Entry Name`, `Protein names`, `PlantReactome`, `Organism`) %>%

group_by(`PlantReactome`) %>%

summarise_all(list) %>%

ungroup()%>%

unnest(cols = everything())

write.csv(PlantReactome,"PlantReactome.csv")

#Merge DrugBank and Disease dataframes on the 'Entry Name' column

drug_disease_interaction <- merge(x = DrugBank, y = disease, by = "Protein names", suffixes = c("_Drug", "_Disease"))%>%

select(`Protein names`, DrugBank, `Involvement in disease`)

write.csv(drug_disease_interaction,"drug_disease_interaction.csv")

#counts for the drugs dataset

drug_counts <- drug_disease_interaction %>%

separate_rows(DrugBank, sep = ";") %>%

mutate(DrugBank = str_trim(DrugBank),

DrugBank = str_remove(DrugBank, "\\.$")) %>%

filter(!str_starts(DrugBank, "DB")) %>%

count(DrugBank, sort = TRUE) %>%

filter(n>5)

write.csv(drug_counts,"drug_counts.csv")

**5. Functional annotation**

#Loading the libraries for the run

library(tidyverse)

library(ggVennDiagram)

library(gplots)

#Loading the data needed for the R

COG <- read.table('COG_best.txt', sep = '\t', header = TRUE, fill = TRUE, quote = "")

KEGG <- read.table('KEGG_Annotation.txt', sep = '\t', header = TRUE, fill = TRUE, quote = "")

NR <- read.table('NR_Annotation.txt', sep = '\t', header = TRUE, fill = TRUE, quote = "")

SWISSPROT <- read.table('Swissprot_Annotation.txt', sep = '\t', header = TRUE, fill = TRUE, quote = "")

#Filter and keep only the Gene_ID column

COG_venn<- select(COG, Gene_ID)

KEGG_venn <- select(KEGG, Gene_ID)

NR_venn <- select(NR, Gene_ID)

SWISSPROT_venn <- select(SWISSPROT, Gene_ID)

gene_lists <- list(COG = COG_venn$Gene_ID, KEGG = KEGG_venn$Gene_ID, NR = NR_venn$Gene_ID, SWISSPROT = SWISSPROT_venn$Gene_ID)

#venn-diagram for the annotation

pdf('Annotation_venn.pdf', width=13, height=9, bg = "transparent")

ggVennDiagram(gene_lists, set_color = c("black", "black", "black", "black")) + scale_fill_gradient(low = "ivory", high = "goldenrod1")

dev.off()

#Loading the data needed for the R

GO <- read.table('GO_Annotation.txt', sep = '\t', header = TRUE, fill = TRUE, quote = "")

INTERPRO <- read.table('INTERPRO_Annotation.txt', sep = '\t', header = TRUE, fill = TRUE, quote = "")

#Filter and keep only the Gene_ID column

GO_venn<- select(GO, Gene_ID)

INTERPRO_venn <- select(INTERPRO, Protein_Accession)

protein_lists <- list(GO = GO_venn$Gene_ID, INTERPRO = INTERPRO_venn$Protein_Accession)

#venn-diagram for the annotation

pdf('Functional_venn.pdf', width=5, height=5, bg = "transparent")

ggVennDiagram(protein_lists, set_color = c("black", "black")) + scale_fill_gradient(low = "ivory", high = "goldenrod1")

dev.off()

#analyse and group the datatset

df.interpro <- INTERPRO %>%

select(`Signature_Description`, `InterPro_Annotations`, `Analysis`) %>%

group_by(`Analysis`)%>%

summarise(Count = n())

write.csv(df.interpro, "interpro-groups.csv")

**6. Functional annotation**

#Loading the libraries for the run

library(tidyverse)

library(ggVennDiagram)

library(gplots)

#Loading the data needed for the R

COG <- read.table('COG_best.txt', sep = '\t', header = TRUE, fill = TRUE, quote = "")

KEGG <- read.table('KEGG_Annotation.txt', sep = '\t', header = TRUE, fill = TRUE, quote = "")

NR <- read.table('NR_Annotation.txt', sep = '\t', header = TRUE, fill = TRUE, quote = "")

SWISSPROT <- read.table('Swissprot_Annotation.txt', sep = '\t', header = TRUE, fill = TRUE, quote = "")

#Filter and keep only the Gene_ID column

COG_venn<- select(COG, Gene_ID)

KEGG_venn <- select(KEGG, Gene_ID)

NR_venn <- select(NR, Gene_ID)

SWISSPROT_venn <- select(SWISSPROT, Gene_ID)

gene_lists <- list(COG = COG_venn$Gene_ID, KEGG = KEGG_venn$Gene_ID, NR = NR_venn$Gene_ID, SWISSPROT = SWISSPROT_venn$Gene_ID)

#venn-diagram for the annotation

pdf('Annotation_venn.pdf', width=13, height=9, bg = "transparent")

ggVennDiagram(gene_lists, set_color = c("black", "black", "black", "black")) + scale_fill_gradient(low = "ivory", high = "goldenrod1")

dev.off()

#Loading the data needed for the R

GO <- read.table('GO_Annotation.txt', sep = '\t', header = TRUE, fill = TRUE, quote = "")

INTERPRO <- read.table('INTERPRO_Annotation.txt', sep = '\t', header = TRUE, fill = TRUE, quote = "")

#Filter and keep only the Gene_ID column

GO_venn<- select(GO, Gene_ID)

INTERPRO_venn <- select(INTERPRO, Protein_Accession)

protein_lists <- list(GO = GO_venn$Gene_ID, INTERPRO = INTERPRO_venn$Protein_Accession)

#venn-diagram for the annotation

pdf('Functional_venn.pdf', width=5, height=5, bg = "transparent")

ggVennDiagram(protein_lists, set_color = c("black", "black")) + scale_fill_gradient(low = "ivory", high = "goldenrod1")

dev.off()

#analyse and group the datatset

df.interpro <- INTERPRO %>%

select(`Signature_Description`, `InterPro_Annotations`, `Analysis`) %>%

group_by(`Analysis`)%>%

summarise(Count = n())

write.csv(df.interpro, "interpro-groups.csv

**7. FPKM interval**

# Load necessary libraries

library(tidyverse)

library(ggplot2)

# Read the file as a tab-separated values (TSV) file

FPKM <- read.table('interval.xls', sep = '\t', header = TRUE, fill = TRUE, quote = "")

head(FPKM)

# Melt the data for ggplot2

FPKM_melted <- gather(FPKM, key = "Interval", value = "Count", -FPKM.Interval)

# Convert the Count values from percentage format to numeric values

FPKM_melted <- FPKM_melted %>%

mutate(Count = as.numeric(gsub("\\(.*\\)|%", "", Count)))

head(FPKM_melted)

# Remove the 'X' from the Interval values, replace '.' with spaces, '..' with '>', and 'to' with ' - '

FPKM_melted$Interval <- FPKM_melted$Interval %>%

gsub("^X", "", .) %>%

gsub("\\.\\.", " > ", .) %>%

gsub("\\.", " ", .) %>%

gsub(" to ", " - ", .)

head(FPKM_melted)

# Calculate total counts for each interval

interval_totals <- FPKM_melted %>%

group_by(Interval) %>%

summarise(Total = sum(Count)) %>%

arrange(Total)

# Reorder intervals based on total counts

FPKM_melted$Interval <- factor(FPKM_melted$Interval, levels = interval_totals$Interval)

# Define pastel colors for fill

interval_colors <- c("#FFFF99", "#ADD8E6", "#90EE90", "#FFB6C1", "#FFC107") # Corresponding to intervals

# Create the stacked bar plot with borders and transparency

FPKM <- ggplot(FPKM_melted, aes(fill = Interval, y = Count, x = FPKM.Interval)) +

geom_bar(position = "stack", stat = "identity", width = 0.6, alpha = 1, colour = "grey60", size = 0.1) + # Adjust border thickness here

theme_minimal() +

scale_fill_manual(values = interval_colors) +

labs(title = "FPKM distribution",

x = NULL,

y = "Counts (%)") +

theme(

text = element_text(family = "Arial", size = 10), # Set all text to Arial and size 10

axis.text.x = element_text(angle = 0, vjust = 1, hjust = 0.5),

axis.text.y = element_text(),

axis.title.x = element_text(face = "bold"),

axis.title.y = element_text(face = "bold"),

plot.title = element_text(face = "bold", size = 12), # Title slightly larger

legend.title = element_text(face = "bold"), # Make legend title bold

panel.grid.major = element_line(color = "grey70", size = 0.1),

panel.grid.minor = element_line(color = "grey80", size = 0.1),

panel.border = element_rect(color = "grey50", fill = NA, size = 0.2)

)

print(FPKM)

# Save the plot to a file

ggsave("FPKM_Interval_Distribution_Ordered.tiff", plot = FPKM, width = 5, height = 3, dpi = 1200)

**8. BLAT**

# Load necessary libraries

library(tidyverse)

library(data.table)

library(ggtext) # For element_markdown

# Define column names for PSL format

psl_colnames <- c("matches", "misMatches", "repMatch", "nCount", "qNumInsert",

"qBaseInsert", "tNumInsert", "tBaseInsert", "strand",

"qName", "qSize", "qStart", "qEnd", "tName", "tSize",

"tStart", "tEnd", "blockCount", "blockSizes", "qStarts", "tStarts")

# Read the PSL file using fread with the correct delimiter and column names

BLAT <- fread(file = 'Huhu.psl', sep = '\t', header = FALSE, col.names = psl_colnames)

# Filter out the 'qName' column

BLAT_filtered <- BLAT %>% select(qStart, qEnd)

# Define custom breaks for the axes

x_breaks <- seq(0, 100, by = 10)

y_breaks <- seq(0, 60, by = 10)

# Create a scatter plot with reversed axes (qEnd vs qStart) and customized axis units

qEnd_qStart_plot <- ggplot(BLAT_filtered, aes(x = qEnd, y = qStart)) +

geom_point(alpha = 0.5, color = "goldenrod1", size = 0.5) +

labs(title = "qEnd vs qStart",

x = "qEnd",

y = "qStart") +

theme_minimal() +

scale_x_continuous(breaks = x_breaks, limits = c(20, 90)) +

scale_y_continuous(breaks = y_breaks, limits = c(0, 60))

# Save the plot as a TIFF image

tiff('qEnd_qStart_plot.tiff', units="in", width=8, height=3, res=1200, compression = 'lzw')

print(qEnd_qStart_plot)

dev.off()

**9. Differential expression**

#Loading libraries for the run

library(tidyverse)

library(DESeq2)

library(limma)

library(edgeR)

library(RColorBrewer)

library(gplots)

library(EnhancedVolcano)

library(ggplot2)

library(svglite)

library(pheatmap)

library(ComplexHeatmap)

library(dplyr)

library(circlize)

library(grid)

library(beeswarm)

library(VennDiagram)

library(ggVennDiagram)

library(extrafont)

#Function to abbreviate species names

abbreviate_species <- function(description)

{species_name <- gsub(".*\\[(.*)\\].*", "\\1", description)

abbreviated_species <- gsub("(\\w)\\w*\\s(\\w+)", "\\1.\\2", species_name)

description <- gsub(species_name, abbreviated_species, description)

return(description)}

#Read the data file

df <- read.csv("all.fpkm_anno.xls.csv")

df$NR_Description <- sapply(df$NR_Description, abbreviate_species)

#Summarize the data, apply ceiling, and merge back the description

df.tmp <- df %>%

dplyr::select(NR_protein_ID,

NR_Description,

Huhu.S1.001_expected_count,

Huhu.S1.002_expected_count,

Huhu.S1.003_expected_count,

Huhu.L1.001_expected_count,

Huhu.L1.002_expected_count,

Huhu.L1.003_expected_count) %>%

dplyr::rename(Huhu.S1 = Huhu.S1.001_expected_count,

Huhu.S2 = Huhu.S1.002_expected_count,

Huhu.S3 = Huhu.S1.003_expected_count,

Huhu.L1 = Huhu.L1.001_expected_count,

Huhu.L2 = Huhu.L1.002_expected_count,

Huhu.L3 = Huhu.L1.003_expected_count) %>%

group_by(NR_Description) %>%

summarise(across(starts_with("Huhu"), ~ mean(.x, na.rm = TRUE)), .groups = 'drop') %>%

mutate(across(starts_with("Huhu.S"), ceiling)) %>%

mutate(across(starts_with("Huhu.L"), ceiling)) %>%

column_to_rownames(var = "NR_Description")

#deseq2

#Differential expression setup

conds = c("Huhu.S","Huhu.S","Huhu.S","Huhu.L","Huhu.L","Huhu.L")

dds <- DESeqDataSetFromMatrix(countData = as.matrix(df.tmp),

colData = data.frame(conds = factor(conds)),

design = formula(~conds))

dds.tmp <- counts(dds)

write.csv(dds.tmp,"counts_deseq2.csv")

#Fit DESeq model to identify DE transcripts

dds = DESeq(dds)

colData(dds)

res = DESeq2::results(dds)

head(res)

knitr::kable(res[1:6,])

summary(res)

res = na.omit(res)

resPadj=res[res$padj <= 0.05 , ]

dim(resPadj)

sum(res$padj <= 0.05)

sum(p.adjust(res$pvalue, method="fdr") <= 0.05)

sum(p.adjust(res$pvalue, method="holm") <= 0.01)

res = res[order(res$padj),]

#export the data outside

write.csv(as.data.frame(res),file='deseq2.csv')

#Regularizing log transformation for clustering/heat maps, etc

rld=rlogTransformation(dds)

head(assay(rld))

#Histogram to plot the relative transformed expression

hist(assay(rld), xlab="Relative distribution", ylab="Frequency",col="goldenrod2", ylim=c(0,1.5e+05), xlim=c(-5,15), main="Large vs Small", cex.main=0.8, cex.sub=0.8, cex.lab=0.8, cex.axis=0.8)

#Sample distance plot for difference between group

mycols <- brewer.pal(8, "Dark2")[1:length(unique(conds))]

sampleDist <- as.matrix(dist(t(assay(rld)), method = "euclidean")) * 0.25

svg('Sample_distance.svg', width=6, height=6)

par(family="Arial")

heatmap.2(as.matrix(sampleDist), key=FALSE, trace="none", density.info="histogram",

col=colorpanel(200, "goldenrod2", "ivory"),

ColSideColors=mycols[conds], RowSideColors=mycols[conds],

margin=c(8, 8), main="Sample distance plot",

cex.main=2, cex.sub=1.5, cex.lab=1.5, cex.axis=1.5,

cexRow=1.5, cexCol=1.5)

dev.off()

#Significant - Top50

top_genes_deseq2 <- as.data.frame(res) %>%

dplyr::filter(pvalue < 0.05 & abs(log2FoldChange) > 2) %>%

dplyr::arrange(pvalue, desc(abs(log2FoldChange))) %>%

head(50)

write.csv(top_genes_deseq2,"top_deseq2.csv")

#filter for A.glabripennis

res_deseq2 <- read.csv("deseq2.csv")

top_A.glabripennis <-as.data.frame(res_deseq2) %>%

filter(grepl("\\[A\\.glabripennis\\]$", ID)) %>%

dplyr::filter(pvalue < 0.05 & abs(log2FoldChange) > 2) %>%

head(50)

write.csv(top_A.glabripennis,"top_A.glabripennis.csv")

#import the analysed data again

res <- read.csv("Updated_DESeq2_Data_with_Labels.csv") %>%

select(-X)

#VolcanoPlot-DE_Transcripts

svg('VPlot_deseq2.svg', width=8, height=8)

EnhancedVolcano(res,

lab = res$Label,

x = 'log2FoldChange',

y = 'pvalue',

xlab = bquote(~Log[2]~ 'fold change'),

ylab = 'p-value',

boxedLabels = TRUE,

xlim = c(-10, 10),

title = 'Small vs Large',

subtitle = "Differential expression - DESeq2",

pCutoff = 10e-12,

FCcutoff = 2,

pointSize = 2,

labSize = 4,

col=c('grey', 'grey', 'grey', 'goldenrod1'),

colAlpha = 0.75,

cutoffLineType = 'dashed',

cutoffLineCol = 'black',

cutoffLineWidth = 0.2,

gridlines.major = FALSE,

gridlines.minor = FALSE,

legendLabels=c('Not-sig','Log2FC','p-value', 'p-value & Log2FC'),

legendPosition = 'bottom',

legendLabSize = 12,

drawConnectors = TRUE,

widthConnectors = 1,

colConnectors = 'black',

max.overlaps = 30,

axisLabSize = 12,

titleLabSize = 14)

dev.off()

#Heat map-DE_Transcripts

top_A_glabripennis <- read.csv("top_A.glabripennis.csv")

counts_deseq2 <- read.csv("counts_deseq2.csv")

filtered_counts <- counts_deseq2 %>%

filter(ID %in% top_A_glabripennis$ID)%>%

mutate(ID = gsub("\\[A\\.glabripennis\\]", "", ID))

write.csv(filtered_counts, "filtered_counts_deseq2.csv", row.names = FALSE)

#DE-heatmap

hmap.DE <- read.csv("hmap-edited.csv")%>%

mutate(across(-ID, ~ (. - min(.)) / (max(.) - min(.))))%>%

column_to_rownames("ID") %>%

as.matrix()

#Color coding for the heatmap

col.s <- colorRamp2(c(0, max(hmap.DE, na.rm = TRUE) / 4, max(hmap.DE, na.rm = TRUE) / 3, max(hmap.DE, na.rm = TRUE) / 2, max(hmap.DE, na.rm = TRUE)), c("ivory", "lightgoldenrod2", "springgreen3", "palegreen3", "salmon"))

svg("DE_Hmap.svg", width = 4, height = 8, bg = "transparent", family = "arial")

Heatmap(hmap.DE,

cluster_rows = FALSE,

cluster_columns = FALSE,

col = col.s,

show_row_names = TRUE,

show_column_names = TRUE,

column_names_gp = gpar(fontsize = 12),

row_names_gp = gpar(fontsize = 10),

row_names_side = "left",

column_names_rot = 90,

column_title = "A.glabripennis normalised counts",

column_title_gp = gpar(fontsize = 12, fontface = "bold"),

heatmap_legend_param = list(title = "Counts"),

rect_gp = gpar(col = "grey", lwd = 0.5),

border_gp = gpar(col = "black", lty = 0.5),

column_gap = unit(2, "mm"),

column_title_rot = 0,

# Add cell values as text within each heatmap block

cell_fun = function(j, i, x, y, width, height, fill) {

grid.text(sprintf("%.2f", hmap.DE[i, j]), x, y, gp = gpar(fontsize = 8, col = "black"))

})

dev.off()

#for PPI

PPI <- df %>%

filter(grepl("\\[Anoplophora glabripennis\\]$", NR_Description))

#limma

#read dataset for limma and do the needed analysis

df.tmp <- df %>%

dplyr::select(NR_protein_ID,

NR_Description,

Huhu.S1.001_expected_count,

Huhu.S1.002_expected_count,

Huhu.S1.003_expected_count,

Huhu.L1.001_expected_count,

Huhu.L1.002_expected_count,

Huhu.L1.003_expected_count) %>%

dplyr::rename(Huhu.S1 = Huhu.S1.001_expected_count,

Huhu.S2 = Huhu.S1.002_expected_count,

Huhu.S3 = Huhu.S1.003_expected_count,

Huhu.L1 = Huhu.L1.001_expected_count,

Huhu.L2 = Huhu.L1.002_expected_count,

Huhu.L3 = Huhu.L1.003_expected_count) %>%

group_by(NR_Description) %>%

summarise(across(starts_with("Huhu"), ~ mean(.x, na.rm = TRUE)), .groups = 'drop') %>%

mutate(across(starts_with("Huhu.S"), ceiling)) %>%

mutate(across(starts_with("Huhu.L"), ceiling))

counts <- as.data.frame(df.tmp[, 2:7])

rownames(counts) <- df.tmp$NR_Description

head(counts)

colSums(counts)

colSums(counts == 0)

#process the dge list

dge = DGEList(counts=counts)

dge = calcNormFactors(dge)

logCPM = cpm(dge, log=TRUE, prior.count=3)

options(width=100)

head(logCPM, 3)

#The beeswarm

t.test(logCPM[6,] ~ conds)

design = model.matrix(~conds)

design

v = voom(dge, design, plot=TRUE)

q = voom(dge, design, plot=TRUE, normalize="quantile")

#statistical testing

fit = lmFit(v, design)

fit = eBayes(fit)

tt = topTable(fit, coef=ncol(design), n=nrow(counts))

head(tt)

sum(tt$adj.P.Val < 0.05)

sum(p.adjust(tt$P.Value, method="fdr") <= 0.05)

#export the data outside

write.csv(as.data.frame(tt),file='limma.csv')

#volcano plot

volcanoplot(fit, coef=2)

sigGenes = which(tt$adj.P.Val <= 0.05)

length(sigGenes)

volcanoplot(fit, coef=2)

points(tt$logFC[sigGenes], -log10(tt$P.Value[sigGenes]), col='red', pch=16, cex=0.5)

sigGenes = which(tt$adj.P.Val <= 0.05 & (abs(tt$logFC) > log2(2)))

length(sigGenes)

volcanoplot(fit, coef=2)

points(tt$logFC[sigGenes], -log10(tt$P.Value[sigGenes]), col='red', pch=16, cex=0.5)

limmaPadj = tt[tt$adj.P.Val <= 0.05, ]

#edgeR

#read dataset for edgeR and do the needed analysis

df.tmp <- df %>%

dplyr::select(NR_protein_ID,

NR_Description,

Huhu.S1.001_expected_count,

Huhu.S1.002_expected_count,

Huhu.S1.003_expected_count,

Huhu.L1.001_expected_count,

Huhu.L1.002_expected_count,

Huhu.L1.003_expected_count) %>%

dplyr::rename(Huhu.S1 = Huhu.S1.001_expected_count,

Huhu.S2 = Huhu.S1.002_expected_count,

Huhu.S3 = Huhu.S1.003_expected_count,

Huhu.L1 = Huhu.L1.001_expected_count,

Huhu.L2 = Huhu.L1.002_expected_count,

Huhu.L3 = Huhu.L1.003_expected_count) %>%

group_by(NR_Description) %>%

summarise(across(starts_with("Huhu"), ~ mean(.x, na.rm = TRUE)), .groups = 'drop') %>%

mutate(across(starts_with("Huhu.S"), ceiling)) %>%

mutate(across(starts_with("Huhu.L"), ceiling))

counts <- as.data.frame(df.tmp[, 2:7])

rownames(counts) <- df.tmp$NR_Description

head(counts)

colSums(counts)

colSums(counts == 0)

#DGEList for the edge run

y = DGEList(counts=counts, group=conds)

y = calcNormFactors(y)

y = estimateCommonDisp(y)

y = estimateTagwiseDisp(y)

et = exactTest(y)

knitr::kable(topTags(et, n=4)$table)

edge = as.data.frame(topTags(et, n=nrow(counts)))

sum(edge$FDR <= 0.05)

sum(p.adjust(edge$PValue, method="fdr") <= 0.05)

edgePadj = edge[edge$FDR <= 0.05, ]

#export the data outside

write.csv(as.data.frame(edge),file='edge.csv')

#Common genes between the 3 different packages

#Venn diagram

setlist = list(edgeR=rownames(edgePadj), DESeq2=rownames(resPadj))

venn(setlist)

setlist = list(edgeR=rownames(edgePadj),

DESeq2=rownames(resPadj),

Limma=rownames(limmaPadj))

pdf("DE_venn.pdf", width = 5, height = 5, bg = "transparent")

ggVennDiagram(setlist, set_color = c("black", "black", "black")) + scale_fill_gradient(low = "ivory", high = "goldenrod1")

dev.off()

#merge and split the dataframe to create grouped dataset for the remaining analysis

deseq2 <- read.csv("deseq2.csv")

edgeR <- read.csv("edge.csv")

limma <- read.csv("limma.csv")

#merge the datasets based on common IDs

df.m <- deseq2 %>%

inner_join(edgeR %>% select(ID), by = "ID") %>%

inner_join(limma %>% select(ID), by = "ID") %>%

select(names(deseq2)) %>%

mutate(Species = sub(".*\\[(.*)\\].*", "\\1", ID))

write.csv(df.m, "merged.csv", row.names = FALSE)

#Significant_deseq

top_genes_deseq2.m <- as.data.frame(df.m) %>%

dplyr::filter(pvalue < 0.05 & abs(log2FoldChange) > 2) %>%

dplyr::arrange(pvalue, desc(abs(log2FoldChange))) %>%

head(100)

write.csv(top_genes_deseq2.m,"top_merged.csv")

#filter for A.glabripennis

res_deseq2.m <- read.csv("merged.csv") %>%

as.data.frame()

top_A.glabripennis.m <-as.data.frame(res_deseq2.m) %>%

filter(grepl("\\[A\\.glabripennis\\]$", ID)) %>%

dplyr::filter(pvalue < 0.05 & abs(log2FoldChange) > 2) %>%

head(100)

write.csv(top_A.glabripennis.m,"top_A.glabripennis_merged.csv")

#import the analysed data again adn filter it

res.M <- read.csv("top_deseq2_M_labelled.csv")

merged_with_labels <- res_deseq2.m %>%

left_join(res.M %>% select(ID, Label), by = "ID") %>%

mutate(Gene.ID = gsub("\\[.*\\]", "", Label) %>% trimws())

write.csv(merged_with_labels,"merged_DE_labelled.csv")

#VolcanoPlot-DE_Transcripts

svg('VPlot_deseq2.svg', width=8, height=9)

EnhancedVolcano(merged_with_labels,

lab = merged_with_labels$Gene.ID,

x = 'log2FoldChange',

y = 'pvalue',

xlab = bquote(~Log[2]~ 'fold change'),

ylab = 'p-value',

boxedLabels = TRUE,

xlim = c(-10, 10),

title = 'Small vs Large',

subtitle = "Differential expression - DESeq2",

pCutoff = 10e-12,

FCcutoff = 2,

pointSize = 1,

labSize = 3,

col=c('grey', 'grey', 'grey', 'goldenrod1'),

colAlpha = 0.75,

cutoffLineType = 'dashed',

cutoffLineCol = 'black',

cutoffLineWidth = 0.2,

gridlines.major = FALSE,

gridlines.minor = FALSE,

legendLabels=c('Not-sig','Log2FC','p-value', 'p-value & Log2FC'),

legendPosition = 'bottom',

legendLabSize = 12,

drawConnectors = TRUE,

widthConnectors = 0.15,

colConnectors = 'black',

max.overlaps = 75,

axisLabSize = 12,

titleLabSize = 14)+

scale_x_continuous(breaks = seq(-10, 14, by = 2)) +

scale_y_continuous(breaks = seq(0, 300, by = 25))

dev.off()

**10. PCA**

#Loading libraries for the run

library(tidyr)

library(dplyr)

library(DESeq2)

library(RColorBrewer)

library(ggsci)

library(gplots)

library(EnhancedVolcano)

library(corrr)

library(ggcorrplot)

library(FactoMineR)

library(genefilter)

library(factoextra)

library(ggplot2)

library(ggrepel) # For better text labels

# Read the datafile and adjust it

fcData = read.table('all.fpkm_anno.txt', sep='\t', header=TRUE)

fcData %>% head()

dim(fcData)

names(fcData)

# rename the data columns

names(fcData)[3:8] = c("Huhu-L1", "Huhu-L2", "Huhu-L3", "Huhu-S1", "Huhu-S2", "Huhu-S3")

fcData %>% head()

# Extract counts data

counts = fcData[, 3:8]

rownames(counts) = fcData$Gene_ID

counts %>% head()

counts_L = fcData[, 3:5]

rownames(counts_L) = fcData$Gene_ID

counts_L %>% head()

counts_S = fcData[, 6:8]

rownames(counts_S) = fcData$Gene_ID

counts_S %>% head()

#Read counts per sample

colSums(counts)

colSums(counts_L)

colSums(counts_S)

#Color coding the groups

Colour=c("goldenrod1", "goldenrod1", "goldenrod1", "goldenrod1", "goldenrod1", "goldenrod1")

Colour

Colour_small=c("goldenrod1", "goldenrod1", "goldenrod1")

Colour_small

Colour_large=c("lightgoldenrod1", "lightgoldenrod1", "lightgoldenrod1")

Colour_large

#Fixing the font size of

cex.main=2 #change font size of title

cex.sub=2 #change font size of subtitle

cex.lab=2 #change font size of axis labels

cex.axis=2 #change font size of axis text

#Visualizing the counts data

boxplot(as.matrix(counts) ~ col(counts),

key=F, trace="none", col=Colour, margin=c(5, 5),

xlab="Samples",

ylab="Counts", main="Counts for small and large", cex.main=0.8, cex.sub=0.8, cex.lab=0.8, cex.axis=0.8)

# Check the dimensions before removal

dim(counts)

dim(counts_L)

dim(counts_S)

#Normalizing the zero counts from the set

colSums(counts==0)

colSums(counts_L==0)

colSums(counts_S==0)

# Identify rows with zero counts

Counts <- rowSums(counts == 0) > 0

Counts_L <- rowSums(counts_L == 0) > 0

Counts_S <- rowSums(counts_S == 0) > 0

# Remove rows with zero counts

counts <- counts[!Counts, ]

counts_L <- counts_L[!Counts_L, ]

counts_S <- counts_S[!Counts_S, ]

# Check the dimensions after removal

dim(counts)

dim(counts_L)

dim(counts_S)

#Log transformation (add 0.5 to avoid log(0) issues)

logCounts = log2(as.matrix(counts)+ 1.5)

logCounts_L = log2(as.matrix(counts_L)+ 1.5)

logCounts_S = log2(as.matrix(counts_S)+ 1.5)

#Visualizing the log-transformed counts data directly in RStudio

boxplot(as.matrix(logCounts) ~ col(logCounts),

key=F, trace="none", col=Colour, margin=c(5, 5),

xlab="Samples",

ylab="Counts", main="Counts for small and large", cex.main=0.8, cex.sub=0.8, cex.lab=0.8, cex.axis=0.8)

#Visualizing the logged counts data - DensityPlot

plot(density(logCounts[,1]), ylim=c(0,1.2), xlim=c(0.2,2), col=Colour[1], margin=c(5, 5), main="Counts for small and large", cex.main=0.8, cex.sub=0.8, cex.lab=0.8, cex.axis=0.8)

for(i in 2:ncol(logCounts)) lines(density(logCounts[,i]), col=Colour[i])

#Normalizing the values in each group

countsNormalised <- scale(counts)

head(countsNormalised)

#Normalized Heatmap on samples groups

Matrix <- cor(countsNormalised)

ggcorrplot(Matrix, colors=c("goldenrod1", "white", "lightgoldenrod1"), outline.color = "white")

ggplot(pca_scores, aes(x = PC1, y = PC2, color = Colour, label = rownames(pca_scores))) +

geom_point(size = 2) +

geom_text_repel(size = 2, box.padding = 0.25, max.overlaps = 5, color = "black") + # Make labels black

stat_ellipse(type = "norm", linetype = 2, aes(group = Group)) + # Add ellipses by Group

labs(title = "Principal component analysis (PCA) ", x = "PC1", y = "PC2") +

geom_hline(yintercept = 0, color = "black", size = 0.1) +

geom_vline(xintercept = 0, color = "black", size = 0.1) +

theme_minimal() +

theme(

plot.title = element_text(size = 8, face = "bold"),

axis.title = element_text(size = 6, face = "bold"), # Make axis titles bold

axis.text = element_text(color = "black", size = 6),

legend.title = element_text(color = "black", size = 6),

legend.text = element_text(color = "black", size = 6),

panel.grid.major = element_line(color = "black", size = 0.1), # Major grid lines

panel.grid.minor = element_line(color = "black", size = 0.1), # Minor grid lines

panel.grid.major.x = element_line(color = "black", size = 0.025),

panel.grid.minor.x = element_line(color = "black", size = 0.025),

panel.grid.major.y = element_line(color = "black", size = 0.025),

panel.grid.minor.y = element_line(color = "black", size = 0.025),

) +

scale_x_continuous(breaks = scales::pretty_breaks(n = 5)) + # Create x-axis ticks

scale_y_continuous(breaks = scales::pretty_breaks(n = 5)) + # Create y-axis ticks

scale_color_identity() # Use the exact colors from the Colour vector

# Save the plot with high resolution

ggsave('PCA.tif', units="in", width=2.5, height=2.1, dpi=1200, compression = 'none')

**11. k2rt_blastp**

# Load required libraries

library(dplyr)

# Read the TSV files

blastp_data <- read.csv("blastp_filtered.tsv", sep = "\t", stringsAsFactors = FALSE)

huhu_data <- read.csv("Huhu_k2rt_filtered.tsv", sep = "\t", stringsAsFactors = FALSE)

# Step 1: Clean the 'qseqid' column by removing ".p*" patterns

blastp_data$qseqid <- gsub("\\.p[0-9]+", "", blastp_data$qseqid)

# Step 2: Merge the datasets on qseqid and Component_ID

merged_data <- huhu_data %>%

inner_join(blastp_data %>% select(qseqid, sseqid, ssciname, scomname, sskingdoms),

by = c("Component_ID" = "qseqid"))

# Step 3: Export the merged data to a CSV file

write.csv(merged_data, "k2rt_blastp_data.csv", row.names = FALSE)

# Informative message

cat("The merged data has been saved to:", "k2rt_blastp_data.csv", "\n")

data <- read.csv("k2rt_blastp_data.csv")

# Clean the 'sseqid' column by removing 'sp|' from the start and '|' from the end

data <- data %>%

mutate(sseqid_clean = gsub("^sp\\|", "", sseqid),

sseqid_clean = gsub("\\|$", "", sseqid_clean))

# Save the cleaned data to a new CSV file

write.csv(data, "cleaned_k2rt_blastp_data.csv", row.names = FALSE)

# Load the dataset

file_path <- "cleaned_k2rt_blastp_data.csv"

data <- read.csv(file_path)

# Remove the . followed by any number from the 'sseqid' column

data$sseqid <- gsub("\\.\\d+", "", data$sseqid)

data <- data %>%

mutate(sseqid_clean = gsub("^sp\\|", "", sseqid),

sseqid_clean = gsub("\\|$", "", sseqid_clean))

# Save the cleaned dataset

write.csv(data, "k2rt_blastp.csv", row.names = FALSE)

# Verify the first few rows of the cleaned 'sseqid' column

head(data$sseqid)

# Load the datasets

blastp_file <- "k2rt_blastp.csv"

uniprot_file <- "UniprotMapping.tsv"

# Read the BLASTP and UniProt data

blastp_data <- read.csv(blastp_file)

uniprot_data <- read.delim(uniprot_file, sep = "\t")

colnames(uniprot_data)

# Merge the two datasets based on 'sseqid_clean' from blastp_data and 'Entry' from uniprot_data

merged_data <- blastp_data %>%

left_join(uniprot_data %>%

select(`Entry`, `Entry.Name`, `Protein.names`, `Gene.Names`, `Length`),

by = c("sseqid_clean" = "Entry"))

# Save the merged dataset to a new CSV file

write.csv(merged_data, "merged_k2rt_blastp_uniprot.csv", row.names = FALSE)

# Print the first few rows of the merged dataset to verify

head(merged_data)

# Set the path to the input file (adjust this as needed)

input_file <- "merged_k2rt_blastp_uniprot.csv"

# Read the CSV file

data <- read.csv(input_file)

# Ensure the Is_not_synonymous column is treated as a logical value

# Convert to lower case in case of "True"/"False" strings

data$Is_not_synonymous <- tolower(as.character(data$Is_not_synonymous))

# Split the data into synonymous and non-synonymous mutations

synonymous <- data %>% filter(Is_not_synonymous == "false")

non_synonymous <- data %>% filter(Is_not_synonymous == "true")

# Function to remove the species suffix (_****) from the Entry.Name column

extract_gene <- function(Entry.Name) {

# Split the entry name by the underscore and take the first part (gene name)

return(sub("_.*$", "", Entry.Name))

}

# Load the CSV files

non_synonymous_df <- read.csv("non_synonymous_mutations.csv")

synonymous_df <- read.csv("synonymous_mutations.csv")

# Create the "Gene" column in the non-synonymous dataset

non_synonymous_df <- non_synonymous_df %>%

mutate(Gene = sapply(Entry.Name, extract_gene))

# Create the "Gene" column in the synonymous dataset

synonymous_df <- synonymous_df %>%

mutate(Gene = sapply(Entry.Name, extract_gene))

# Write the data to separate CSV files

write.csv(synonymous_df, "synonymous_mutations.csv", row.names = FALSE)

write.csv(non_synonymous_df, "non_synonymous_mutations.csv", row.names = FALSE)

# Output message

cat("Synonymous and non-synonymous mutation files have been created.\n")

**12. SNP**

#Load necessary libraries

library(tidyverse)

library(ComplexHeatmap)

library(circlize)

library(svglite)

library(readxl)

#Read and process synonymous SNPs

df <- read.csv("merged_k2rt_blastp_uniprot.csv") %>%

select(c(5:10, 21, 25, 28)) %>%

select(Entry.Name, ssciname, Length, SNP_position, Codon_1, Codon_2, Amino_acid_1, Amino_acid_2, Is_not_synonymous) %>%

separate(Entry.Name, into = c("Gene", "Organism"), sep = "_") %>%

select(-Organism) %>%

as_tibble() %>%

select(-Is_not_synonymous) %>%

mutate(transition = paste0(Codon_1, " (", Amino_acid_1, ") ", " → ", Codon_2, " (", Amino_acid_2, ") "),

n.count = 1) %>%

select(Gene, ssciname, transition, n.count) %>%

group_by(Gene, ssciname, transition) %>%

summarise(n.sum = sum(n.count), .groups = "drop") %>%

pivot_wider(names_from = transition, values_from = n.sum, values_fill = list(n.sum = 0))

#Calculate column sums and filter out those with sums less than 2

column_sums <- colSums(df[ , sapply(df, is.numeric)])

columns_to_keep <- names(column_sums[column_sums >= 2])

df <- df %>%

select(c("Gene", "ssciname", all_of(columns_to_keep)))

#Sum rows and filter those with sum greater than 2

df <- df %>%

rowwise() %>%

mutate(row_sum = sum(c_across(where(is.numeric)), na.rm = TRUE)) %>%

filter(row_sum >= 2) %>%

ungroup() %>%

select(-row_sum)

#Save ssciname for splitting before converting to matrix

sscinames <- df$ssciname

#Add ID and arrange by ssciname

df <- df %>%

mutate(ID = paste(Gene, ssciname, sep = "_")) %>%

arrange(ssciname)

#Convert to matrix

df.matrix <- df %>%

select(-c("Gene", "ssciname")) %>%

column_to_rownames(var = "ID") %>%

as.matrix()

split.s <- factor(rownames(df.matrix), levels = rownames(df.matrix))

#heat map-square

#Load the Excel sheet into R

df.ns <- read_excel("non-synonymous.xlsx")

#Create a matrix for the heatmap and remove non-numeric columns, but keep 'ID' for row names

df.ns.temp1 <- df.ns %>%

select(-Gene, -ssciname) %>%

column_to_rownames("ID") %>%

as.matrix()

#Extract gene names and species names to use for row labels and grouping

gene_names <- df.ns$Gene[match(rownames(df.ns.temp1), df.ns$ID)]

species <- df.ns$ssciname[match(rownames(df.ns.temp1), df.ns$ID)]

#Clean species names (e.g., remove extra spaces and convert to lowercase for consistency)

species <- factor(str_trim(species))

genes <- factor(str_trim(gene_names))

#Color coding for the heatmap

col.ns <- colorRamp2(

c(0, max(df.ns.temp1, na.rm = TRUE) / 5, max(df.ns.temp1, na.rm = TRUE) / 3,

max(df.ns.temp1, na.rm = TRUE) / 2, 2 * max(df.ns.temp1, na.rm = TRUE) / 3, max(df.ns.temp1, na.rm = TRUE)),

c("grey99", "grey80", "grey60", "darkgoldenrod3", "goldenrod1", "lightgoldenrod1")

)

#Create the heatmap and save it as a TIFF file

svg("non-syn.svg", width = 17, height = 25, bg = "transparent", family = "arial")

Heatmap(df.ns.temp1,

cluster_rows = FALSE,

cluster_columns = FALSE,

col = col.ns,

row_split = species,

show_row_names = TRUE,

show_column_names = TRUE,

row_labels = genes,

row_names_side = "left", # Move row names to the left

row_names_rot = 0,

heatmap_legend_param = list(title = "Counts"),

rect_gp = gpar(col = "grey", lwd = 0.5),

border_gp = gpar(col = "black", lty = 0.5),

row_gap = unit(3, "mm"),

row_title_rot = 0)

dev.off()

#heat map-square

#Load the Excel sheet into R

df.s <- read_excel("synonymous.xlsx")

#Add ID and arrange by ssciname

df.s <- df.s %>%

mutate(ID = paste(Gene, ssciname, sep = ":")) %>%

arrange(ssciname)

#Create a matrix for the heatmap and remove non-numeric columns, but keep 'ID' for row names

df.s.temp1 <- df.s %>%

select(-Gene, -ssciname) %>%

column_to_rownames("ID") %>%

as.matrix()

#Extract gene names and species names to use for row labels and grouping

gene_names <- df.s$Gene[match(rownames(df.s.temp1), df.s$ID)]

species <- df.s$ssciname[match(rownames(df.s.temp1), df.s$ID)]

#Clean species names (e.g., remove extra spaces and convert to lowercase for consistency)

species <- factor(str_trim(species))

genes <- factor(str_trim(gene_names))

#Color coding for the heatmap

col.s <- colorRamp2(

c(0, max(df.s.temp1, na.rm = TRUE) / 5, max(df.s.temp1, na.rm = TRUE) / 3,

max(df.s.temp1, na.rm = TRUE) / 2, 2 * max(df.s.temp1, na.rm = TRUE) / 3, max(df.s.temp1, na.rm = TRUE)),

c("grey99", "grey80", "grey60", "darkgoldenrod3", "goldenrod1", "lightgoldenrod1")

)

#Create the heatmap and save it as a TIFF file

svg("syn.svg", width = 9, height = 21, bg = "transparent", family = "arial")

Heatmap(df.s.temp1,

cluster_rows = FALSE,

cluster_columns = FALSE,

col = col.ns,

row_split = species,

show_row_names = TRUE,

show_column_names = TRUE,

row_labels = genes,

row_names_side = "right", # Row names on the right

row_names_rot = 0,

row_title_side = "right", # Move species name (row split title) to the right

heatmap_legend_param = list(title = "Counts"),

rect_gp = gpar(col = "grey", lwd = 0.5),

border_gp = gpar(col = "black", lty = 0.5),

row_gap = unit(3, "mm"),

row_title_rot = 0)

dev.off()

**13. Species_DE**

#Load libraries

library(tidyverse)

library(dplyr)

library(ComplexHeatmap)

library(circlize)

library(readxl)

#Read the DESeq2 data

deseq2_data <- read.csv("DESeq2.csv")

#Extract species information from the column containing ID and group them

deseq2_data$Species <- str_extract(deseq2_data$ID, "\\[(.*?)\\]") %>% str_remove_all("[\\[\\]]")

deseq2_data <- deseq2_data %>%

mutate(Regulation = ifelse(log2FoldChange > 0, "Up-regulated", "Down-regulated"))

#Count the number of up- and down-regulated genes per species

regulation_counts <- deseq2_data %>%

group_by(Species, Regulation) %>%

summarise(count = n()) %>%

spread(Regulation, count, fill = 0) %>%

mutate(Ratio = `Up-regulated` / `Down-regulated`) %>%

arrange(desc(`Up-regulated`), desc(`Down-regulated`)) %>%

head(25) %>%

column_to_rownames(var = "Species") %>%

as.data.frame()

write.csv(regulation_counts, "species_DE.csv")

#Define color mapping for the `Down-regulated` and `Up-regulated` columns

col.s <- colorRamp2(c(0, max(regulation_counts, na.rm = TRUE) / 4,

max(regulation_counts, na.rm = TRUE) / 3,

max(regulation_counts, na.rm = TRUE) / 2,

max(regulation_counts, na.rm = TRUE)),

c("ivory", "lightgoldenrod2", "springgreen3", "palegreen3", "salmon"))

#Define a separate color mapping for the `Ratio` column

ratio_col.s <- colorRamp2(c(0, max(regulation_counts$Ratio, na.rm = TRUE)),

c("ivory", "goldenrod1"))

#Create the heatmap with `Ratio` as an additional column using HeatmapAnnotation

svg("DE_Species_Hmap.svg", width = 4, height = 8, bg = "transparent", family = "arial")

#Main heatmap for Down-regulated and Up-regulated columns with values displayed in cells

ht_main <- Heatmap(as.matrix(regulation_counts[, c("Down-regulated", "Up-regulated")]),

name = "Counts",

cluster_rows = FALSE,

cluster_columns = FALSE,

col = col.s,

show_row_names = TRUE,

show_column_names = TRUE,

column_names_gp = gpar(fontsize = 10),

row_names_gp = gpar(fontsize = 10),

row_names_side = "left",

column_names_rot = 90,

column_title = "Species distribution - Differential expression",

column_title_gp = gpar(fontsize = 10, fontface = "bold"),

heatmap_legend_param = list(title = "Counts"),

rect_gp = gpar(col = "grey", lwd = 0.5),

border_gp = gpar(col = "black", lty = 0.5),

# Adding values for Down-regulated and Up-regulated in cells

cell_fun = function(j, i, x, y, width, height, fill) {

if (j == 1) {

grid.text(sprintf("%d", regulation_counts$`Down-regulated`[i]), x, y, gp = gpar(fontsize = 8, col = "black"))

} else if (j == 2) {

grid.text(sprintf("%d", regulation_counts$`Up-regulated`[i]), x, y, gp = gpar(fontsize = 8, col = "black"))

}

})

#Adding the Ratio column as a separate heatmap with values displayed in cells

ht_ratio <- Heatmap(as.matrix(regulation_counts[, "Ratio", drop = FALSE]),

name = "Ratio",

cluster_rows = FALSE,

col = ratio_col.s,

show_row_names = FALSE,

show_column_names = TRUE,

column_names_gp = gpar(fontsize = 10),

heatmap_legend_param = list(title = "Ratio"),

rect_gp = gpar(col = "grey", lwd = 0.5),

border_gp = gpar(col = "black", lty = 0.5),

# Adding the ratio values as text in cells

cell_fun = function(j, i, x, y, width, height, fill) {

grid.text(sprintf("%.2f", regulation_counts$Ratio[i]), x, y, gp = gpar(fontsize = 8, col = "black"))

})

#Draw the heatmaps together

draw(ht_main + ht_ratio)

dev.off()

#Read the datasets

df1 <- read_excel("Group_HS1-VS-HL1_DE_significant_anno.xlsx")

df2 <- read_excel("Group_HS2-VS-HL2_DE_significant_anno.xlsx")

df3 <- read_excel("Group_HS3-VS-HL3_DE_significant_anno.xlsx")

#Function to preprocess individual datasets

preprocess_dataset <- function(data)

{

data <- data %>%

mutate(Regulation = ifelse(logFC > 0, "Upregulated", "Downregulated")) %>%

select(logFC, FDR, NR_Description, Regulation)

return(data)

}

#Preprocess each dataset

df1 <- preprocess_dataset(df1)

df2 <- preprocess_dataset(df2)

df3 <- preprocess_dataset(df3)

# Merge datasets and calculate averages

m_df <- bind_rows(df1 %>% mutate(Dataset = "df1"), df2 %>% mutate(Dataset = "df2"), df1 %>% mutate(Dataset = "df3"))

#Calculate averages for logFC and FDR

avg_df <- m_df %>%

group_by(NR_Description) %>%

summarize(logFC = mean(logFC, na.rm = TRUE), FDR = mean(FDR, na.rm = TRUE), .groups = 'drop') %>%

mutate(logFC = round(logFC, 4), Regulation = ifelse(logFC > 0, "Upregulated", "Downregulated"), CommonName = stringr::str_extract(NR_Description, "(?<=\\[).*?(?=\\])"), NR_Description = stringr::str_remove(NR_Description, "\\[.*?\\]"))

#Split the data into upregulated and downregulated groups

up <- avg_df %>%

filter(Regulation == "Upregulated") %>%

group_by(CommonName) %>%

summarize(

Count = n(),

Avg_logFC = mean(logFC, na.rm = TRUE),

.groups = 'drop')

down <- avg_df %>%

filter(Regulation == "Downregulated") %>%

group_by(CommonName) %>%

summarize(

Count = n(),

Avg_logFC = mean(logFC, na.rm = TRUE),

.groups = 'drop')

#Merge upregulated and downregulated groups by CommonName

Species_df <- full_join(up %>% rename(Upregulated_Count = Count, Upregulated_Avg_logFC = Avg_logFC),

down %>% rename(Downregulated_Count = Count, Downregulated_Avg_logFC = Avg_logFC),

by = "CommonName")%>%

select(CommonName, Upregulated_Count, Downregulated_Count)

write.csv(Species_df,"Species_DE.csv")

#Load necessary libraries

library(tidyverse)

library(taxize)

#Function to fetch taxonomy for a species

fetch_taxonomy <- function(species_name)

{tryCatch({result <- classification(species_name, db = "itis")

if (!is.null(result[[1]])) {

taxonomy <- result[[1]]

taxonomy$species <- species_name

return(taxonomy)

}

else

{

return(data.frame(rank = NA, name = NA, species = species_name))

}}, error = function(e) {

return(data.frame(rank = NA, name = NA, species = species_name))})}

#Read the input file

input_file <- "DE.txt"

species_list <- readLines(input_file)

#Standardize taxonomy results for consistent columns

standardize_taxonomy <- function(taxonomy_df, species_name) {

if (!is.data.frame(taxonomy_df)) {taxonomy_df <- as.data.frame(taxonomy_df)}

taxonomy_df$species <- species_name

all_columns <- c("rank", "name", "species")

missing_columns <- setdiff(all_columns, colnames(taxonomy_df))

for (col in missing_columns)

{

taxonomy_df[[col]] <- NA

}

taxonomy_df <- taxonomy_df[, all_columns]

return(taxonomy_df)}

#Combine taxonomy results into a single data frame

taxonomy_df <- do.call(rbind, lapply(names(taxonomy_results), function(species)

{result <- taxonomy_results[[species]]

if (!is.null(result)) {

return(standardize_taxonomy(result, species))

}

else

{

return(data.frame(rank = NA, name = NA, species = species))}}))

#Save the taxonomy to a CSV file

output_file <- "taxonomy_results.csv"

write.csv(taxonomy_df, output_file, row.names = FALSE)

#Load necessary libraries

library(tidyverse)

library(circlize)

library(pheatmap)

library(ComplexHeatmap)

#Load the datasets

species_de <- read.csv("Species_DE.csv")

class_de <- read.csv("class_DE.csv")

#Merge the datasets

merged_df <- species_de %>%

inner_join(class_de, by = c("CommonName" = "Species")) %>%

select(-contains("Unnamed")) %>%

group_by(Name) %>%

summarise(Sp.Count = n(), 'Up-reg' = as.integer(sum(Upregulated_Count, na.rm = TRUE)), 'Down-reg' = as.integer(sum(Downregulated_Count, na.rm = TRUE))) %>%

arrange(desc(Sp.Count)) %>%

select('Name', 'Down-reg', 'Up-reg', 'Sp.Count')%>%

column_to_rownames("Name") %>%

head(25)%>%

as.matrix()

#Color coding for the heatmap

col.s <- colorRamp2(c(0, max(merged_df, na.rm = TRUE) / 5, max(merged_df, na.rm = TRUE) / 4, max(merged_df, na.rm = TRUE) / 3), c("ivory", "goldenrod1", "palegreen3", "salmon"))

svg("DE_Class.svg", width = 4, height = 8, bg = "transparent", family = "arial")

Heatmap(merged_df,

cluster_rows = FALSE,

cluster_columns = FALSE,

col = col.s,

show_row_names = TRUE,

show_column_names = TRUE,

column_names_gp = gpar(fontsize = 12),

row_names_gp = gpar(fontsize = 10),

row_names_side = "left",

column_names_rot = 90,

column_title = "Differentially expressed classes",

column_title_gp = gpar(fontsize = 12, fontface = "bold"),

heatmap_legend_param = list(title = "Counts"),

rect_gp = gpar(col = "grey", lwd = 0.5),

border_gp = gpar(col = "black", lty = 0.5),

column_gap = unit(2, "mm"),

column_title_rot = 0,

# Add cell values as text within each heatmap block

cell_fun = function(j, i, x, y, width, height, fill) {

grid.text(sprintf("%.2f", merged_df[i, j]), x, y, gp = gpar(fontsize = 8, col = "black"))

})

dev.off()

**14. GO**

#Load required libraries

library(readxl)

library(dplyr)

library(stringr)

library(tidyr)

library(ggplot2)

library(reshape2)

library(ggdendro)

library(svglite)

#Load the datasets

go <- read.csv("enriched_go_uniprot.csv")%>%

filter(!(GO_Term %in% c("-", "--", "0", "")) & !is.na(GO_Term)) %>%

filter(rowSums(is.na(.) | . == "") < ncol(.))

#Function to split and restructure data for a GO category

df <- go %>%

group_by(GO_Term) %>%

summarise(GO_Category = first(GO_Category), Protein_Names = first(Protein.names), Entry_Names = paste(unique(Entry.Name), collapse = ","), Gene_Counts = length(unique(Entry.Name)))%>%

arrange(desc(Gene_Counts))

#Process sum of GO category

category_counts <- df %>%

group_by(GO_Category) %>%

summarise(Counts = n()) %>%

arrange(desc(Counts)) %>%

mutate(Percentage = round((Counts / sum(Counts)) * 100, 1), GO_Category = recode(GO_Category, "Biological Process" = "BP", "Cellular Component" = "CC", "Molecular Function" = "MF"))

#Create a pie chart

custom_colors <- c("BP" = "salmon", "CC" = "goldenrod1", "MF" = "springgreen1")

pie_chart <- ggplot(category_counts, aes(x = "", y = Counts, fill = GO_Category)) +

geom_bar(stat = "identity", width = 1) +

coord_polar(theta = "y") +

scale_fill_manual(values = custom_colors) +

geom_text(aes(label = paste0(Counts, " ")),

position = position_stack(vjust = 0.5)) +

labs(title = "GO distribution", x = NULL, y = NULL, fill = "Category") +

theme_minimal() +

theme(axis.text = element_blank(),

axis.ticks = element_blank(),

panel.grid = element_blank(),

plot.title = element_text(hjust = 0.5))

ggsave("go_category.svg", plot = pie_chart, width = 5, height = 5)

#Define a function to process datasets

process_dataset <- function(file_path)

{read_excel(file_path) %>%

select(Gene_ID, length, logFC, logCPM, pval, FDR, Uniprot_Acc, NR_Description, Regulation, GO_BP, GO_CC, GO_MF, KO_ID, KO_Definition, COG_ID, COG_Description) %>%

mutate(Species = str_extract(NR_Description, "\\[.*?\\]"), Species = str_remove_all(Species, "\\[|\\]"), NR_Description = str_remove(NR_Description, "\\[.*?\\]")) %>%

mutate(Species = str_trim(Species), Description = str_trim(NR_Description)) %>%

select(-NR_Description) %>%

filter(if_all(everything(), ~ !is.na(.) & . != "-" & . != "--" & . != "0" & . != ""))}

#Process each dataset using the function

df1 <- process_dataset("Group_HS1-VS-HL1_DE_significant_anno.xlsx")

df2 <- process_dataset("Group_HS2-VS-HL2_DE_significant_anno.xlsx")

df3 <- process_dataset("Group_HS3-VS-HL3_DE_significant_anno.xlsx") %>% rename_with(~ paste0(., "_3"), -Gene_ID)

#Merge the three datasets based on Gene_ID

m.df <- df1 %>%

full_join(df2, by = "Gene_ID", suffix = c("_1", "_2")) %>%

full_join(df3, by = "Gene_ID") %>%

rowwise() %>%

mutate(

logFC_avg = mean(c_across(matches("^logFC_")), na.rm = TRUE),

logCPM_avg = mean(c_across(matches("^logCPM_")), na.rm = TRUE),

pval_avg = mean(c_across(matches("^pval_")), na.rm = TRUE),

FDR_avg = mean(c_across(matches("^FDR_")), na.rm = TRUE)) %>%

ungroup() %>%

filter(!is.na(Uniprot_Acc_1) & Uniprot_Acc_1 != "0" & Uniprot_Acc_1 != "-" & Uniprot_Acc_1 != "--") %>%

select(Gene_ID, logFC_avg, logCPM_avg, pval_avg, FDR_avg, Uniprot_Acc_1)

#Rejoin NR_Description and Species columns from the initial df1

m.df <- m.df %>%

left_join(df1 %>% select(Gene_ID, Description, Species, length, Regulation, GO_BP, GO_CC, GO_MF, KO_ID, KO_Definition, COG_ID, COG_Description), by = "Gene_ID")%>%

rename(Uniprot_ID = Uniprot_Acc_1)%>%

rename(logFC = logFC_avg)%>%

rename(logCPM = logCPM_avg)%>%

rename(pval = pval_avg)%>%

rename(FDR = FDR_avg)

#Load the data

functional_annotations <- read.csv("Functional_Annotations.csv", stringsAsFactors = FALSE)

id_mapping <- read.delim("idmapping_2024_11_28.tsv", header = TRUE, sep = "\t", stringsAsFactors = FALSE)

#Rename columns for clarity

colnames(id_mapping) <- c("From", "Entry", "Entry.Name", "Protein.Names",

"Gene.Names", "Gene.Names.Synonym", "Gene.Names.Primary")

#Merge datasets, keeping both identifiers

merged_data <- functional_annotations %>%

rename(Original_Uniprot_ID = Uniprot_ID)%>%

left_join(id_mapping %>% select(Entry, Entry.Name, Gene.Names.Primary), by = c("Original_Uniprot_ID" = "Entry"))%>%

select(-Gene_ID)%>%

rename(Gene_ID = Entry.Name)%>%

rename(Uniprot_ID = Original_Uniprot_ID)%>%

rename(Gene_Name = Gene.Names.Primary)%>%

rename(S.No = X)%>%

select(S.No, Gene_ID, Uniprot_ID, Gene_Name, Description, length, Species, logFC, logCPM, pval, FDR, Regulation, GO_BP, GO_CC, GO_MF, KO_ID, KO_Definition, COG_ID, COG_Description)

#Separate GO Analysis datasets

go <- merged_data %>%

select(Gene_ID, Uniprot_ID, Gene_Name, GO_BP, GO_CC, GO_MF, logFC, logCPM, pval, FDR, Regulation) %>%

filter(!is.na(GO_BP) & !is.na(GO_CC) & !is.na(GO_MF))

#Function to process GO terms by regulation status with statistics

process_go_terms <- function(go, go_column) {

processed_data <- go %>%

select(!!sym(go_column), Gene_ID, Uniprot_ID, Gene_Name, logFC, pval, logCPM, FDR) %>%

filter(!is.na(!!sym(go_column))) %>%

separate_rows(!!sym(go_column), sep = ";") %>%

group_by(!!sym(go_column)) %>%

summarise(

Gene_ID = paste(unique(Gene_ID), collapse = ","),

Gene_Name = paste(unique(Gene_Name), collapse = ","),

Uniprot_ID = paste(unique(Uniprot_ID), collapse = ","),

.groups = "drop"

)

colnames(processed_data)[1] <- "GO_Term"

return(processed_data)

}

#Process each GO category by regulation with statistics

go_bp <- process_go_terms(go, "GO_BP") %>%

mutate(GO_Category = "Biological Process")

go_cc <- process_go_terms(go, "GO_CC") %>%

mutate(GO_Category = "Cellular Component")

go_mf <- process_go_terms(go, "GO_MF") %>%

mutate(GO_Category = "Molecular Function")

#Combine all GO terms into a single dataframe

go_terms <- bind_rows(go_bp, go_cc, go_mf)%>%

mutate(Gene_Count = sapply(strsplit(Gene_ID, ","), length))%>%

filter(!is.na(GO_Term) & GO_Term != "" & GO_Term != "-" & GO_Term != "--")%>%

mutate(GO_Category = sub("(^GO:\\d+):.*", "\\1", GO_Term), Term = sub("^GO:\\d+:(.*)", "\\1", GO_Term))%>%

select(-GO_Term)%>%

select(Gene_ID, Gene_Name, Uniprot_ID,Gene_Count, GO_Category, Term)

write.csv(go_terms, "go_annotations.csv")

#Read the datasets

df1 <- read_excel("HS1-VS-HL1.xlsx")

df2 <- read_excel("HS2-VS-HL2.xlsx")

df3 <- read_excel("HS3-VS-HL3.xlsx")

#Define common columns for merging

common_columns <- c("category", "term", "ontology")

#merge the datasets and convert numeric columns to numeric type

m.df <- df1%>%

inner_join(df2, by = common_columns, suffix = c("_1", "_2"))%>%

inner_join(df3%>% rename_with(~ paste0(., "_3"), -common_columns), by = common_columns)%>%

mutate(across(ends_with("_1"), as.numeric, .names = "{.col}"))%>%

mutate(across(ends_with("_2"), as.numeric, .names = "{.col}"))%>%

mutate(across(ends_with("_3"), as.numeric, .names = "{.col}"))

#Compute averages for each group of columns with matching suffixes

final_df <- m.df %>%

mutate(numDEInCat_average = rowMeans(select(., numDEInCat_1, numDEInCat_2, numDEInCat_3), na.rm = TRUE),

numInCat_average = rowMeans(select(., numInCat_1, numInCat_2, numInCat_3), na.rm = TRUE),

over_represented_pvalue_average = rowMeans(select(., over_represented_pvalue_1, over_represented_pvalue_2, over_represented_pvalue_3), na.rm = TRUE),

over_represented_FDR_average = rowMeans(select(., over_represented_FDR_1, over_represented_FDR_2, over_represented_FDR_3), na.rm = TRUE),

GeneNumber_Up_average = rowMeans(select(., `GeneNumber(Up)_1`, `GeneNumber(Up)_2`, `GeneNumber(Up)_3`), na.rm = TRUE),

GeneNumber_Down_average = rowMeans(select(., `GeneNumber(Down)_1`, `GeneNumber(Down)_2`, `GeneNumber(Down)_3`), na.rm = TRUE)) %>%

select(all_of(common_columns), ends_with("_average"))

write.csv(final_df, "GO_datasets_merged.csv")

#Read the datasets

go_annotations <- read.csv("go_annotations.csv")

go_datasets_merged <- read.csv("GO_datasets_merged.csv")

#Merge the datasets by the common columns

merged_data <- merge(go_annotations, go_datasets_merged, by.x = "GO_Category", by.y = "category", all = FALSE)%>%

select(Gene_ID, Gene_Name, Uniprot_ID, Gene_Count, GO_Category,

term, ontology, numDEInCat_average, numInCat_average,

over_represented_pvalue_average, over_represented_FDR_average,

GeneNumber_Up_average, GeneNumber_Down_average) %>%

rename(numDEInCat = numDEInCat_average,

numInCat = numInCat_average,

over_represented_pvalue = over_represented_pvalue_average,

over_represented_FDR = over_represented_FDR_average,

GeneNumber_Up = GeneNumber_Up_average,

GeneNumber_Down = GeneNumber_Down_average) %>%

mutate(numDEInCat = round(numDEInCat),

numInCat = round(numInCat),

GeneNumber_Up = round(GeneNumber_Up),

GeneNumber_Down = round(GeneNumber_Down),

Ratio = numDEInCat / numInCat) %>%

arrange(desc(Gene_Count))

#Save the merged data to a new CSV file

write.csv(merged_data, "merged_GO_datasets.csv", row.names = FALSE)

#Load the dataset

df <- read.csv("merged_GO_datasets.csv", stringsAsFactors = FALSE)

df.go <- read.csv("go_terms_clusters.csv", stringsAsFactors = FALSE)

df.annotation <- df %>%

filter(over_represented_FDR < 0.05, over_represented_pvalue < 0.05) %>%

select(GO_Category, term, numDEInCat, over_represented_pvalue, ontology, GeneNumber_Up, GeneNumber_Down, Ratio) %>%

rename(Code = GO_Category,

Term = term,

numDE = numDEInCat,

pvalue = over_represented_pvalue,

Type = ontology,

Up = GeneNumber_Up,

Down = GeneNumber_Down,

Ratio = Ratio) %>%

mutate(Type = recode(Type,

"BP" = "Biological process",

"CC" = "Cellular component",

"MF" = "Molecular function")) %>%

arrange(desc(numDE)) %>%

group_by(Type) %>%

slice_max(numDE, n = 25) %>%

ungroup() %>%

arrange(desc(numDE))

write.csv(df.annotation,"GOPlot.csv")

go.tmp <- df.annotation %>%

left_join(df.go %>% select(Term, Cluster, `Cluster.Name`), by = "Term")

write.csv(go.tmp, "go_terms_clusters.csv")

go <- read.csv("clusters.csv") %>%

mutate(Term_With_Expression = paste0(Code, " (", Down, "↓)"," (", Up, "↑)"))

#Convert the long sheet to a matrix for calculating the distance.

go_matrix <- dcast(go,Term~Cluster, value.var = "numDE")

rownames(go_matrix) <- go_matrix[["Term"]]

go_matrix = go_matrix [,-1]

go_matrix[is.na(go_matrix)] = 0

Segement = data.frame()

Label = data.frame()

Num = 0

for( Level in unique(go$Type)){

GROUP = go$Term[go$Type == Level]

hc <- hclust(dist(go_matrix[row.names(go_matrix) %in% GROUP,]))

dendr <- dendro_data(hc, type="rectangle") # convert for ggplot

S_tmp <- segment(dendr)

S_tmp$Level <- Level

L_tmp <- label(dendr)

Segement <- rbind(Segement, S_tmp)

Label <- rbind(Label, L_tmp)

}

colnames(Segement)[5] = "Type"

#Synchrony the Levels

go$Cluster = factor(go$Cluster, levels = c("hclust", as.character(unique(go$Cluster) )))

Segement$Cluster = "hclust"

#Normalised GOPlot

go.plot <- ggplot() +

geom_point(data= go, aes(x = Cluster, y = Term, size = numDE, color = Ratio)) +

facet_grid(Type ~ Cluster, scales = 'free', switch = "y") +

scale_color_gradient2(high = "salmon", mid = "goldenrod1", low = "springgreen1", name = "Ratio") +

theme_bw() +

theme(

strip.text = element_text(face = "bold"),

strip.background = element_rect(colour = "black", fill = FALSE),

axis.text.x = element_blank(),

axis.ticks = element_blank(),

plot.title = element_text(hjust = 0.5),

legend.position = "right",

axis.text.y.right = element_text(hjust = 1)

) +

labs(title = "GO Enrichment", x = "Clusters", y = "Categories", size = "Counts") +

geom_segment(data = Segement, aes(x = -y, y = x, xend = -yend, yend = xend)) +

scale_y_discrete(

position = "right",

labels = function(x) {

# Map unique labels for each facet

go %>%

filter(Term %in% x) %>%

arrange(match(Term, x)) %>%

pull(Term_With_Expression)

}

)

ggsave(filename = "goplot.svg", device = "svg", plot = go.plot, scale = 2, height = 15, width = 10, units = "cm", dpi = 300)

**15. KO**

#Load necessary libraries

library(readxl)

library(dplyr)

library(stringr)

#Define a function to process datasets

process_dataset <- function(file_path)

{read_excel(file_path) %>%

select(Gene_ID, length, logFC, logCPM, pval, FDR, Uniprot_Acc, NR_Description, Regulation, GO_BP, GO_CC, GO_MF, KO_ID, KO_Definition, COG_ID, COG_Description) %>%

mutate(Species = str_extract(NR_Description, "\\[.*?\\]"), Species = str_remove_all(Species, "\\[|\\]"), NR_Description = str_remove(NR_Description, "\\[.*?\\]")) %>%

mutate(Species = str_trim(Species), Description = str_trim(NR_Description)) %>%

select(-NR_Description) %>%

filter(if_all(everything(), ~ !is.na(.) & . != "-" & . != "--" & . != "0" & . != ""))}

#Process each dataset using the function

df1 <- process_dataset("Group_HS1-VS-HL1_DE_significant_anno.xlsx")

df2 <- process_dataset("Group_HS2-VS-HL2_DE_significant_anno.xlsx")

df3 <- process_dataset("Group_HS3-VS-HL3_DE_significant_anno.xlsx") %>% rename_with(~ paste0(., "_3"), -Gene_ID)

#Merge the three datasets based on Gene_ID

m.df <- df1 %>%

full_join(df2, by = "Gene_ID", suffix = c("_1", "_2")) %>%

full_join(df3, by = "Gene_ID") %>%

rowwise() %>%

mutate(

logFC_avg = mean(c_across(matches("^logFC_")), na.rm = TRUE),

logCPM_avg = mean(c_across(matches("^logCPM_")), na.rm = TRUE),

pval_avg = mean(c_across(matches("^pval_")), na.rm = TRUE),

FDR_avg = mean(c_across(matches("^FDR_")), na.rm = TRUE)) %>%

ungroup() %>%

filter(!is.na(Uniprot_Acc_1) & Uniprot_Acc_1 != "0" & Uniprot_Acc_1 != "-" & Uniprot_Acc_1 != "--") %>%

select(Gene_ID, logFC_avg, logCPM_avg, pval_avg, FDR_avg, Uniprot_Acc_1)

#Rejoin NR_Description and Species columns from the initial df1

m.df <- m.df %>%

left_join(df1 %>% select(Gene_ID, Description, Species, length, Regulation, GO_BP, GO_CC, GO_MF, KO_ID, KO_Definition, COG_ID, COG_Description), by = "Gene_ID")%>%

rename(Uniprot_ID = Uniprot_Acc_1)%>%

rename(logFC = logFC_avg)%>%

rename(logCPM = logCPM_avg)%>%

rename(pval = pval_avg)%>%

rename(FDR = FDR_avg)

write.csv(m.df,"Functional_Annotations.csv")

Down_id_mapping <- read.delim("idmapping_2024_12_10.tsv", header = TRUE, sep = "\t", stringsAsFactors = FALSE)

m.df.down <- m.df %>%

filter(Regulation=="Down")%>%

left_join(Down_id_mapping, by = c("Uniprot_ID" = "Entry"))

write.csv(m.df.down,"FAnn_down.csv")

Up_id_mapping <- read.delim("idmapping_2024_12_10 (1).tsv", header = TRUE, sep = "\t", stringsAsFactors = FALSE)

m.df.ups <- m.df %>%

filter(Regulation=="Ups")%>%

left_join(Up_id_mapping, by = c("Uniprot_ID" = "Entry"))

write.csv(m.df.ups,"FAnn_ups.csv")

**16. COG**

#Load necessary libraries

library(readxl)

library(dplyr)

library(stringr)

#Define a function to process datasets

process_dataset <- function(file_path)

{read_excel(file_path) %>%

select(Gene_ID, length, logFC, logCPM, pval, FDR, Uniprot_Acc, NR_Description, Regulation, GO_BP, GO_CC, GO_MF, KO_ID, KO_Definition, COG_ID, COG_Description) %>%

mutate(Species = str_extract(NR_Description, "\\[.*?\\]"), Species = str_remove_all(Species, "\\[|\\]"), NR_Description = str_remove(NR_Description, "\\[.*?\\]")) %>%

mutate(Species = str_trim(Species), Description = str_trim(NR_Description)) %>%

select(-NR_Description) %>%

filter(if_all(everything(), ~ !is.na(.) & . != "-" & . != "--" & . != "0" & . != ""))}

#Process each dataset using the function

df1 <- process_dataset("Group_HS1-VS-HL1_DE_significant_anno.xlsx")

df2 <- process_dataset("Group_HS2-VS-HL2_DE_significant_anno.xlsx")

df3 <- process_dataset("Group_HS3-VS-HL3_DE_significant_anno.xlsx") %>% rename_with(~ paste0(., "_3"), -Gene_ID)

#Merge the three datasets based on Gene_ID

m.df <- df1 %>%

full_join(df2, by = "Gene_ID", suffix = c("_1", "_2")) %>%

full_join(df3, by = "Gene_ID") %>%

rowwise() %>%

mutate(

logFC_avg = mean(c_across(matches("^logFC_")), na.rm = TRUE),

logCPM_avg = mean(c_across(matches("^logCPM_")), na.rm = TRUE),

pval_avg = mean(c_across(matches("^pval_")), na.rm = TRUE),

FDR_avg = mean(c_across(matches("^FDR_")), na.rm = TRUE)) %>%

ungroup() %>%

filter(!is.na(Uniprot_Acc_1) & Uniprot_Acc_1 != "0" & Uniprot_Acc_1 != "-" & Uniprot_Acc_1 != "--") %>%

select(Gene_ID, logFC_avg, logCPM_avg, pval_avg, FDR_avg, Uniprot_Acc_1)

#Rejoin NR_Description and Species columns from the initial df1

m.df <- m.df %>%

left_join(df1 %>% select(Gene_ID, Description, Species, length, Regulation, GO_BP, GO_CC, GO_MF, KO_ID, KO_Definition, COG_ID, COG_Description), by = "Gene_ID")%>%

rename(Uniprot_ID = Uniprot_Acc_1)%>%

rename(logFC = logFC_avg)%>%

rename(logCPM = logCPM_avg)%>%

rename(pval = pval_avg)%>%

rename(FDR = FDR_avg)

write.csv(m.df,"Functional_Annotations.csv")

#Load the data

functional_annotations <- read.csv("Functional_Annotations.csv", stringsAsFactors = FALSE)

id_mapping <- read.delim("idmapping_2024_11_28.tsv", header = TRUE, sep = "\t", stringsAsFactors = FALSE)

#Rename columns for clarity

colnames(id_mapping) <- c("From", "Entry", "Entry.Name", "Protein.Names",

"Gene.Names", "Gene.Names.Synonym", "Gene.Names.Primary")

#Merge datasets, keeping both identifiers

merged_data <- functional_annotations %>%

rename(Original_Uniprot_ID = Uniprot_ID)%>%

left_join(id_mapping %>% select(Entry, Entry.Name, Gene.Names.Primary), by = c("Original_Uniprot_ID" = "Entry"))%>%

select(-Gene_ID, -Original_Uniprot_ID)%>%

rename(Gene_ID = Entry.Name)%>%

rename(Gene_Name = Gene.Names.Primary)%>%

rename(S.No = X)%>%

select(S.No, Gene_ID, Gene_Name, Description, length, Species, logFC, logCPM, pval, FDR, Regulation, GO_BP, GO_CC, GO_MF, KO_ID, KO_Definition, COG_ID, COG_Description)

write.csv(merged_data,"Annotations.csv")

#Separate COG Analysis dataset

cog <- merged_data %>%

select(Gene_ID, Gene_Name, COG_ID, COG_Description, logFC, logCPM, pval, FDR, Regulation) %>%

filter(!is.na(COG_ID))

write.csv(cog, "COG.csv", row.names = FALSE)

**17. signalp**

# Load necessary libraries

library(dplyr)

library(stringr)

library(readxl)

library(VennDiagram)

library(grid)

library(svglite)

# Read and preprocess the annotation data

Ann <- read_excel("Annotation.xlsx") %>%

select(geneID, Uniprot_Acc, Uniprot_Description)

# Process the Small dataset

df.S <- read.csv("S.csv", header = TRUE) %>%

mutate(ID = str_extract(X..ID, "TRINITY_[^\\s]+") %>% str_remove("\\.p[1-5]$")) %>%

mutate(ID = gsub("^TRINITY_", "", ID)) %>%

select(-X..ID) %>%

left_join(Ann, by = c("ID" = "geneID")) %>%

filter(!is.na(Uniprot_Acc) & !Uniprot_Acc %in% c("-", "--", "0"))

write.csv(df.S, "Small.csv")

# Process the Large dataset

df.L <- read.csv("L.csv", header = TRUE) %>%

mutate(ID = str_extract(X..ID, "TRINITY_[^\\s]+") %>% str_remove("\\.p[1-5]$")) %>%

mutate(ID = gsub("^TRINITY_", "", ID)) %>%

select(-X..ID) %>%

left_join(Ann, by = c("ID" = "geneID")) %>%

filter(!is.na(Uniprot_Acc) & !Uniprot_Acc %in% c("-", "--", "0"))

write.csv(df.L, "Large.csv")

# Summarize a grouped dataset

summarize_grouped_data <- function(data, group_column) {

data %>% group_by(!!sym(group_column)) %>% summarise(row_count = n())

}

# Summarize the datasets

summary.L <- summarize_grouped_data(df.L, "Prediction")

summary.S <- summarize_grouped_data(df.S, "Prediction")

# Identify common and unique Uniprot_Acc values

common <- intersect(df.L$Uniprot_Acc, df.S$Uniprot_Acc)

unique.L <- setdiff(df.L$Uniprot_Acc, df.S$Uniprot_Acc)

unique.S <- setdiff(df.S$Uniprot_Acc, df.L$Uniprot_Acc)

# Filter datasets to keep only unique rows

large_unique_df <- df.L[df.L$Uniprot_Acc %in% unique.L, ]

small_unique_df <- df.S[df.S$Uniprot_Acc %in% unique.S, ]

# Summarize the unique datasets

u.summary.L <- summarize_grouped_data(large_unique_df, "Prediction")

u.summary.S <- summarize_grouped_data(small_unique_df, "Prediction")

# Reload the datasets

large <- read.csv("Large.csv")

small <- read.csv("Small.csv")

# Create a function to generate a Venn diagram for a specific Prediction value

plot_venn_for_prediction <- function(prediction_type, large, small) {

# Filter the datasets for the specific Prediction type

large_filtered <- large %>% filter(Prediction == prediction_type) %>% pull(ID) %>% unique()

small_filtered <- small %>% filter(Prediction == prediction_type) %>% pull(ID) %>% unique()

# Save the Venn diagram as a PDF file

file_name <- paste0(" ", prediction_type, ".pdf")

pdf(file_name, width = 5, height = 5)

# Create a new page for the grid

grid.newpage()

# Add a title

grid.text(

label = paste(" ", prediction_type),

x = 0.5, y = 0.95, gp = gpar(fontsize = 16, fontface = "bold")

)

# Create the Venn diagram

venn.plot <- draw.pairwise.venn(

area1 = length(large_filtered),

area2 = length(small_filtered),

cross.area = length(intersect(large_filtered, small_filtered)),

category = c("Large", "Small"),

fill = c("darkgoldenrod1", "lightgoldenrod1"),

cat.cex = 1.2,

cex = 1.4

)

# Finalize and save the PDF

dev.off()

cat(paste(" ", prediction_type, "saved to", file_name, "\n"))

}

# Generate and save individual Venn diagrams for specific Prediction values

plot_venn_for_prediction("LIPO", large, small)

plot_venn_for_prediction("OTHER", large, small)

plot_venn_for_prediction("PILIN", large, small)

plot_venn_for_prediction("SP", large, small)

plot_venn_for_prediction("TAT", large, small)

plot_venn_for_prediction("TATLIPO", large, small)

**18. targetp**

# Load necessary libraries

library(tidyverse)

library(VennDiagram)

library(readxl)

library(svglite)

# Read and preprocess the annotation data

Ann <- read_excel("Annotation.xlsx") %>%

select(geneID, Uniprot_Acc, Uniprot_Description)

# Process the Small dataset

column_names <- c("ID", "Prediction", "SP", "noTP", "mTP", "CS_Position")

df.S <- read.table('Small_P_output_summary.targetp2',

sep = "\t",

header = FALSE,

col.names = column_names,

fill = TRUE,

quote = "",

stringsAsFactors = FALSE) %>%

mutate(ID = str_extract(ID, "TRINITY_[^\\s]+") %>% str_remove("\\.p[1-5]$")) %>%

mutate(geneID= gsub("^TRINITY_", "", ID)) %>%

left_join(Ann, by = c("geneID" = "geneID")) %>%

filter(!is.na(Uniprot_Acc) & !Uniprot_Acc %in% c("-", "--", "0"))%>%

select(-ID)

df.L <- read.table('Large_P_output_summary.targetp2',

sep = "\t",

header = FALSE,

col.names = column_names,

fill = TRUE,

quote = "",

stringsAsFactors = FALSE) %>%

mutate(ID = str_extract(ID, "TRINITY_[^\\s]+") %>% str_remove("\\.p[1-5]$")) %>%

mutate(geneID= gsub("^TRINITY_", "", ID)) %>%

left_join(Ann, by = c("geneID" = "geneID")) %>%

filter(!is.na(Uniprot_Acc) & !Uniprot_Acc %in% c("-", "--", "0"))%>%

select(-ID)

# Extract gene IDs from both datasets

large_geneIDs <- unique(df.L$geneID)

small_geneIDs <- unique(df.S$geneID)

# Create a Venn diagram

pdf("targetP.pdf", width = 10, height = 10, onefile = TRUE)

venn.plot <- draw.pairwise.venn(area1 = length(large_geneIDs),

area2 = length(small_geneIDs),

cross.area = length(intersect(large_geneIDs, small_geneIDs)),

category = c("Large Dataset", "Small Dataset"),

fill = c("goldenrod1", "lightgoldenrod"),

alpha = 0.5,

cat.pos = c(0, 0),

cat.dist = 0.03)

dev.off()

# Filter geneIDs with mTP > 0.8

L_genes_above_0_8 <- df.L %>%

filter(mTP > 0.8) %>%

select(Uniprot_Description, mTP, SP, noTP, CS_Position) %>%

distinct()

S_genes_above_0_8 <- df.S %>%

filter(mTP > 0.8) %>%

select(Uniprot_Description, mTP, SP, noTP, CS_Position) %>%

distinct()

# Function to calculate counts

calculate_counts <- function(data, cutoff = 0.8) {

Secretory <- sum(data$SP > cutoff, na.rm = TRUE)

`Cytosolic/non-organelle protein` <- sum(data$noTP > cutoff, na.rm = TRUE)

Mitochondrial <- sum(data$mTP > cutoff, na.rm = TRUE)

return(data.frame(

`Secretory` = Secretory,

`Cytosolic/non-organelle protein` = `Cytosolic/non-organelle protein`,

`Mitochondrial` = Mitochondrial

))

}

# Add a column to indicate the dataset source

"Large" <- L_genes_above_0_8$Dataset%>%

head(15)

"Small" <- S_genes_above_0_8$Dataset%>%

head(15)

# Combine the datasets

combined_genes <- rbind(L_genes_above_0_8%>%head(15), S_genes_above_0_8%>%head(15))

# Select relevant columns (include Dataset column)

plot_data <- combined_genes[, c("Uniprot_Description", "mTP", "Dataset", "SP")]

# Order data by Uniprot_Description

plot_data <- plot_data[order(plot_data$Dataset, plot_data$Uniprot_Description), ]

# Create a rank column for y-axis

plot_data$Rank <- seq_along(plot_data$mTP)

# Create the plot with size based on SP/Secretory value

pdf("mTP.pdf", width = 10, height = 6, onefile = TRUE)

ggplot(plot_data, aes(x = mTP, y = Rank, color = Dataset, size = SP)) +

geom_point(alpha = 0.7) + # Add transparency to better visualize overlapping points

scale_y_reverse(breaks = plot_data$Rank, labels = plot_data$Uniprot_Description) +

facet_wrap(~Dataset, scales = "free_y", ncol = 1) + # Separate panels for each dataset

scale_color_manual(

values = c("Large" = "goldenrod1", "Small" = "lightgoldenrod") # Define custom colors

) +

scale_size_continuous(

name = "SP (Secretory)",

range = c(1, 5) # Adjust the size range for better visualization

) +

scale_x_continuous(

breaks = seq(floor(min(plot_data$mTP)), ceiling(max(plot_data$mTP)), by = 0.025), # Adjust the step size

minor_breaks = NULL # Optional: Remove minor breaks for a cleaner look

) +

labs(

title = "Uniprot Descriptions and mTP Scores (Grouped by Dataset)",

x = "mTP Score",

y = "Proteins (ranked by mTP score)"

) +

theme_minimal() +

theme(

axis.text.y = element_text(size = 8),

axis.title = element_text(size = 12),

plot.title = element_text(size = 14, face = "bold"),

panel.grid.major = element_line(color = "gray", linetype = "dashed", size = 0.05),

strip.text = element_text(size = 12, face = "bold") # Format facet titles

)

dev.off()
