# Supplementary material for: Deciphering Huhu (Prionoplus reticularis) grub development: Transcriptomic insights into metabolic and nutritional shifts in larval stages
Source: Research Square preprint supplement (doi:10.21203/rs.3.rs-6564832/v1), 2025-05-02
Supplement: Supplementary file 2 [file 390d0f17d4161b5bdb8c4c77.docx]

**SUPPLEMENTARY INFORMATION**

**(Additional File 1)**

**Deciphering Huhu (*Prionoplus reticularis*) grub development: Transcriptomic insights into metabolic and nutritional shifts in larval stages**

Ruchita Rao Kavle1,6✝
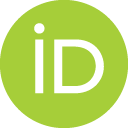
, Bennett Henzeler2,7,✝*
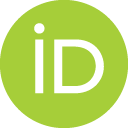
, Ngoni Faya4,8, Pascal Giehr5, Alaa El-Din Ahmed Bekhit1, Alan Carne3, Corinna Kersten5, Sabine Schneider5 and Dominic Agyei1,9*
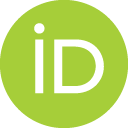


✝Ruchita Rao Kavle and Bennett Henzeler contributed equally to this work

7Present address: Ludwig-Maximilians University, Department of Chemistry, Institute of Chemical Epigenetics, 81377 Munich, Germany

9Present address: School of Chemistry, Monash University, Clayton, 3800, Victoria, Australia

*Correspondence:[dominic.agyei@monash.edu](mailto:dominic.agyei@monash.edu), [bennett.henzeler@cup.lmu.de](mailto:bennett.henzeler@cup.lmu.de)

Full list of author information is available at the end of the article

**Fig. S1**

Percent error rate saturation curve**. A-E** X axis: percentage of sampling reads. Y axis: Percent relative error. Q1 is a saturation box plot with transcript expression levels below 25%, Q2 is a saturation box plot with transcript expression levels between 25% and 50%, Q3 is a saturation box plot with transcript expression levels between 50%, and 75% Q4 is the saturation box plot of transcript expression levels above 75%.

**Fig. S2**

Distribution of SNPs in alternative splicing-associated transcript across developmental stages of Huhu**. A** Schematic overview of the pipeline used for variant identification and mutation analysis employing the KisSplice package (Created with BioRender.com). **B,C** Distribution and frequency of synonymous (Syn) and non-synonymous (NSyn) mutations identified in large grubs relative to small ones using KisSplice. The x-axis denotes specific amino acid substitutions resulting from SNPs, while the y-axis indicates the corresponding genes. **D** Distribution and classification of identified transcripts based on their predicted functions, grouped according to annotations from functional databases such as UniProt and InterPro. **E** SNP positions within transcripts, categorized by their associated protein domains or signatures.

**Fig. S3**

Differential expression and clustering of biological replicates of small and large stages. **A** Volcano plot displaying DESeq2-derived DETs from Huhu.S1 and Huhu.L1 filtered by log2 fold change (±2) and p-value < 0.05. Red dots represent -UPregulated transcripts, whereas blue dots indicate downregulated transcripts. **B** Volcano plot displaying DESeq2-derived DETs from Huhu.S2 and Huhu.L2 filtered by log2 fold change (±2) and p-value < 0.05. Red dots represent upregulated transcripts, whereas blue dots indicate downregulated transcripts. **C** Volcano plot displaying DESeq2-derived DETs from Huhu.S3 and Huhu.L3 filtered by log2 fold change (±2) and p-value < 0.05. Red dots represent upregulated transcripts, whereas blue dots indicate downregulated transcripts. **D** Venn diagram of DETs identified by DESeq2. Overlapping regions indicate transcripts consistently identified across multiple differential expression pipelines, while unique regions highlight genes detected exclusively in each biological replicate. **E** Number of upregulated and downregulated transcript identified in individual processed biological replicate compared between the small and large stages.

**Fig. S4**

Comprehensive COG analysis of differentially expressed transcripts (Up and Downregulated). **A–C** Barplot depicts COG enrichment analyses of differentially expressed transcripts, highlighting key orthologous relationships in each biological replicate. Enrichment terms are color-coded according to their respective DE categories, allowing for clear differentiation and interpretation across replicates.

**Fig. S5**

Comprehensive functional annotation and GO enrichment analysis of differentially expressed transcripts (Up and Downregulated). **A–C** Barplot depicts GO term enrichment analyses of differentially expressed transcripts, highlighting key Biological Processes, Cellular Components, and Molecular Functions in each biological replicate. Enrichment terms are color-coded according to their respective GO categories, allowing for clear differentiation and interpretation across replicates.

**Fig. S6**

Comprehensive KEGG pathway analysis of differentially expressed transcripts (Up and Downregulated). **A–C** Barplot depicts KEGG term enrichment analyses of differentially expressed transcripts, highlighting key pathways in each biological replicate by their gene counts. **D-F** Dotplot depicts KEGG term RichFactors of differentially expressed transcripts based on their Qvalue, highlighting key pathways in each biological replicate by their gene counts.
