# Supplementary material for: Deciphering Huhu (Prionoplus reticularis) grub development: Transcriptomic insights into metabolic and nutritional shifts in larval stages
Source: Research Square preprint supplement (doi:10.21203/rs.3.rs-6564832/v1), 2025-05-02
Supplement: Supplementary file 3 [file 4e5238e5de4c0723784caa8f.xlsx]

## Sheet: Table 1
Sample/Run ID	Raw sequences	Filtered sequences post trimming	Trinity			CD-HIT-est
			Transcripts	N50	Gene/Isoform	Transcripts	N50	Gene/Isoform
Huhu.S1	80537286	80,135,816 (99.5%)	476491	824	113371	476037	824	138082
Huhu.S2	85934436	85,512,726 (99.5%)
Huhu.S3	71609176	71,289,920 (99.5%)
Huhu.L1	68788412	68,465,124 (99.5%)
Huhu.L2	81622576	81,249,468 (99.5%)
Huhu.L3	92524390	92,108,152 (99.5%)
